1 **Multiple hypervirulent methicillin-sensitive *Staphylococcus aureus* lineages**  
2 **contribute towards poor patient outcomes in orthopedic device-related**  
3 **infections**

4

5 Virginia Post<sup>a\*</sup>, Ben Pascoe<sup>b,c,d\*</sup>, Evangelos Mourkas<sup>c</sup>, Jessica K. Calland<sup>e</sup>, Matthew  
6 D. Hitchings<sup>f</sup>, Christoph Erichsen<sup>g</sup>, Julian Fischer<sup>g</sup>, Mario Morgenstern<sup>h</sup>, R. Geoff  
7 Richards<sup>a</sup>, Samuel K. Sheppard<sup>c#</sup> & T. Fintan Moriarty<sup>a,h#</sup>

8

9 <sup>a</sup>AO Research Institute Davos, Davos, Switzerland

10 <sup>b</sup>Centre for Genomic Pathogen Surveillance, Big Data Institute, University of Oxford,  
11 Oxford, United Kingdom

12 <sup>c</sup>Ineos Oxford Institute of Antimicrobial Research, Department of Biology, University  
13 of Oxford, Oxford, United Kingdom

14 <sup>d</sup>Faculty of Veterinary Medicine, Chiang Mai University, Chiang Mai, Thailand

15 <sup>e</sup>Oslo Centre for Biostatistics and Epidemiology, Oslo University Hospital, Oslo,  
16 Norway

17 <sup>f</sup>Swansea University Medical School, Swansea University, Swansea, United Kingdom

18 <sup>g</sup>Department of Trauma Surgery, Trauma Centre Murnau, Murnau, Germany

19 <sup>h</sup>Department of Orthopedic and Trauma Surgery, University Hospital Basel,  
20 Switzerland

21

22 **Running title:** Orthopedic device related *S. aureus* infections

23

24 **#Address correspondence to:** T. Fintan Moriarty, [fintan.moriarty@aofoundation.org](mailto:fintan.moriarty@aofoundation.org)  
25 or Samuel K. Sheppard, [samuel.sheppard@biology.ox.ac.uk](mailto:samuel.sheppard@biology.ox.ac.uk)

26 \*VP and BP contributed equally to this work. SKS and TFM contributed equally to this  
27 work.

28

29

30 **Abstract**

31 Staphylococci are the most common cause of orthopedic device-related infections  
32 (ODRIs), with *Staphylococcus aureus* responsible for a third or more of cases. This  
33 prospective clinical and laboratory study investigated the association of genomic and  
34 phenotypic variation with treatment outcomes in ODRI isolates. Eighty-six invasive *S.*  
35 *aureus* isolates were collected from patients with ODRI, and clinical outcome was  
36 assessed after a follow-up examination of 24 months. Each patient was then  
37 considered to have been "cured" or "not cured" based on predefined clinical criteria.  
38 Whole genome sequencing and molecular characterization identified isolates  
39 belonging to globally circulating community- and hospital-acquired pandemic  
40 lineages. Most isolates were phenotypically susceptible to methicillin and lacked the  
41 *SCCmec* cassette (MSSA), but contained several (hyper) virulence genes, including  
42 toxins and biofilm genes. While recognizing the role of the host immune response, we  
43 identify characteristics of isolate genomes that, with larger datasets, could help  
44 contribute to infection severity or clinical outcome predictions. While this and several  
45 other studies reinforce the role antibiotic resistance (e.g., MRSA infection) has on  
46 treatment failure, it is important not to overlook MSSA that can cause equally  
47 destructive infections and lead to poor patient outcomes.

48

49 **Keywords** *Staphylococcus aureus*; MRSA; MSSA; virulence factors; antibiotic  
50 resistance; orthopedic device-related infections.

51

52 **Importance**

53 *Staphylococcus aureus* is a prominent cause of orthopedic device-associated  
54 infections, yet little is known about how the infecting pathogen, and specifically the  
55 repertoire of genome-encoded virulence factors can impact treatment outcome. Past  
56 studies have focused on distinguishing commensal from invasive *S. aureus* isolates  
57 but in this study, we aim to investigate traits in infecting isolates that influence patient  
58 outcomes. Invasive *S. aureus* isolates were collected from orthopedic-device related  
59 infection patients and categorized according to the success of subsequent treatment  
60 ("cured" /"not cured"), as determined following hospital discharge two years after  
61 initial presentation. Several MSSA hypervirulent clones were associated with a "not  
62 cured" clinical outcome. Improved understanding of the bacterial traits associated  
63 with treatment failure in ODRI will inform the risk assessment, prognosis, and therapy  
64 of these infections.

65

## 66 Introduction

67 The most challenging complication in orthopedic surgery is orthopedic-device related  
68 infection (ODRI), with incidence ranging from 0.7 % to 4.2 % for elective orthopedic  
69 surgeries (1–4). Incidence increases to over 30 % following operative fixation of  
70 complex open fractures (5, 6). While patient health is a key risk factor (including a  
71 high BMI and chronic immunosuppression) for poor treatment outcomes (7, 8), there  
72 is evidence that pathogen genetic diversity can be an indicator of patient outcome  
73 (9–12). *Staphylococcus aureus* is the most common infecting agent (2, 3, 13–15) and  
74 treatment outcome is often complicated by infection with antimicrobial resistant  
75 lineages e.g., methicillin-resistant *S. aureus* (MRSA) (8, 16). Combined with high  
76 virulence potential, MRSA are difficult to treat and are a global healthcare concern.  
77 Despite this, predicting treatment outcomes based on bacterial  
78 phenotypes/genotypes remains difficult (8, 10, 11, 17).

79

80 Hypervirulent pandemic clonal lineages have helped spread *S. aureus* around the  
81 world and the geographic distribution of many lineages is dynamic, with different  
82 lineages dominating infections in specific global regions (18, 19). Waves of MRSA  
83 lineages have risen and been replaced since the emergence of MRSA in the 1940s  
84 (18, 20). These highly structured populations can be grouped into clonal complexes  
85 (CCs) that share five or more alleles at seven multi-locus sequence typing (MLST)  
86 loci (21–23). Community-associated MRSA (CA-MRSA) have begun to replace  
87 hospital-associated MRSA (HA-MRSA) as the dominant epidemic strains (24). The  
88 most prevalent lineages include 5 global community acquired (CA-MRSA) genotypes  
89 CC1, CC8, CC30, CC59 and CC80. The most common hospital-acquired lineages  
90 are CC5, CC22 (UK), CC239 and CC45 (21–23). Combining MLST with traditional  
91 molecular typing techniques such as identification of the staphylococcal cassette  
92 chromosome *mec* (SCC*mec*) (25) and *spa* repeat regions (26) can provide a  
93 nomenclature to describe relevant epidemic clones can be provided. Lineages can  
94 acquire advantageous traits, such as antibiotic resistance, which proliferate in the  
95 population through the descendants of successful strains. This likely occurs in many  
96 instances, however, the extent of this in the context of ODRI remains to be  
97 determined.

98

99 Despite the growing concern of MRSA lineages, MSSA isolates are often the most  
100 common in invasive surgery-related infections (27, 28). Convergent evolution in  
101 several CA- lineages potentially balances the fitness costs of expressing AMR genes  
102 with the acquisition of multiple virulence factors (29–32). Specific genes encoding  
103 putative virulence factors in invasive *S. aureus* disease involve evasion of immune  
104 defenses, including the ability to adhere to and invade host tissues - essential for  
105 ODRI (33, 34). A large body of work has identified many virulence factors, including  
106 Microbial Surface Components Recognizing Adhesive Matrix Molecules  
107 (MSCRAMMs), the polysaccharide intercellular adhesion (PIA), the Staphylococcal  
108 protein A, extracellular proteins such as coagulase, Staphylococcal enterotoxins  
109 (SE), exfoliatins (ET), toxic shock syndrome toxin (TSST), staphyloxanthin,  
110 hemolysins and Panton Valentine leukocidin (PVL) that have a crucial impact on the  
111 pathogenicity of *S. aureus* infections (35–38). Genome-wide association studies have  
112 been applied to numerous bacterial species (39, 40), and identified genes or genetic  
113 elements associated with disease that transcend clonal patterns of inheritance (not  
114 confined to specific lineages) in Staphylococci. Phenotype filtering techniques have  
115 attempted to assess patient risk and predict disease outcome from genetic data  
116 based on enrichment for disease-associated traits (12, 41–43). GWAS approaches  
117 have shown promising disease prediction results (31, 43, 44), as well as AMR  
118 profiles (45). As in other bacterial species (46–48), a better understanding of genome  
119 and transcriptome variation in hypervirulent infection types shows promise for our  
120 ability to predict disease severity in Staphylococci (49).

121

122 In this study we investigate the association between treatment outcomes determined  
123 2 years post-operatively in patients with *S. aureus* ODRI and phenotypic and  
124 genotypic features of the infecting pathogen. Building on recent studies aiming to  
125 predict *S. aureus* virulence from genome sequence (43, 44), we aim to distinguish  
126 high risk lineages, isolates and genes. These features were correlated with mortality  
127 rate in a simplified virulence model using *Galleria mellonella*.

128

## 129 **Results**

130 *S. aureus* isolates were collected from 86 patients undergoing operative revision of  
131 an ODRI (**Supplementary table S1**). Patient outcomes were assessed after a 2-year  
132 follow-up period and "cured" patients were free of infection, surgical and systemic  
133 antibiotic therapy had ceased with function of the affected joint or limb restored. If  
134 one or more of these parameters was negative, patients were considered to have  
135 had a "not cured" outcome (8, 12). Most patients enrolled in the study received  
136 successful treatment and were among the "cured" cohort (**Table 1**; n= 65/86; 75.6%).  
137 Treatment was unsuccessful in 21 patients (n=21/86; 24.4% "not-cured") and multiple  
138 revision surgeries were necessary for nearly all patients (n=83/86; 96.5%).

139

### 140 **Host-associated risk factors**

141 Extensive patient data, types of implanted devices and clinical presentation were  
142 recorded for each infected patient (**Table 1**). Additionally, the effects of patient co-  
143 morbidities (such as diabetes or obesity), fracture types or the time of symptoms  
144 onset on treatment outcome were analyzed (**Table 2**). None of these prognostic  
145 factors alone significantly decreased cure rate.

146

### 147 **Multiple lineages contribute to poor patient outcome**

148 A maximum-likelihood phylogeny was constructed based on shared coding  
149 sequences, present in 95% or more isolates (**Figure 1A**; **Supplementary table S1**).  
150 The collected isolates were genetically diverse and represented 19 different  
151 sequence types (STs) (**Figure 1B**) based on the 7 loci scheme for *S. aureus* and  
152 could be grouped into 18 clonal complexes (CCs) based on 5 or more shared MLST  
153 loci (21). No clear clustering was observed between "cured" and "not-cured" isolates.  
154 Consistent with other European surveillance efforts, six of our seven most common  
155 lineages matched common pandemic *S. aureus* lineages (CC5, CC8, CC22, CC30,  
156 CC45 and CC59) previously identified by the ESCMID study group (collected from 26  
157 European countries between 2006-7) (50). Our isolates predominantly lacked the  
158 *SCCmec* cassette, which confers methicillin resistance and were classified as  
159 methicillin-susceptible *S. aureus* (MSSA; n= 81/86; 94%) (**Figure 1C**).

160

161 Most of our isolates (n=48/86; 55.8%) were from community-acquired lineages  
162 (MSSA or *SCCmec* types I, II, III), including CC30 which was the most common

163 clonal complex identified in our collection (n=14/86; 16.3%) (**Figure 1A+B**). In more  
164 than three quarters (n=11/14; 78.6%,) of cases where this clonal complex was  
165 identified, the patient was deemed to have had a good outcome and a "cured" status  
166 (**Supplementary table S2**). A minority of isolates were identified from other CA-  
167 lineages, CC8 (n=6) and CC59 (n=5), CC45 (n=9), CC7 (n=8), CC15 (n=6). No  
168 isolates were sampled from two common pandemic CA- lineages, CC1 and CC80.

169  
170 Many isolates we identified were from well described hospital-acquired lineages  
171 (n=23/86; 26.7%), including the globally distributed CC5 lineage (n=12) (**Figure**  
172 **1A+B**). Infections from this CC were often unresolved (n=6/12; 50%) and posed the  
173 highest risk of a "not cured" patient outcome. CC22 is the most common sequence  
174 type identified from clinical infections, particularly in the UK (51, 52), but was the 3<sup>rd</sup>  
175 most sampled CC in our collection (n=11/86; 12.8%). This clonal complex was  
176 implicated in a "not cured" patient outcome on only one occasion. All other CCs were  
177 represented by fewer than 5 isolates. One isolate was isolated from the livestock  
178 associated lineage, CC398 (n=1).

179

### 180 ***Accessory genome differences in ODRI isolates***

181 ODRI that leads to a "not cured" patient outcome is a complex process, which is  
182 affected by genetic and environmental differences in the host (**Table 2**) as well as  
183 variation in the infecting bacterial population. To investigate differences in gene  
184 presence between isolates showing phenotypic variation, we further investigated  
185 genes in the accessory genome. We characterized the pangenome using PIRATE  
186 (53) with 86 isolates plus 8 reference strains (to help preserve gene nomenclature).  
187 In total, PIRATE identified 4,142 gene clusters, of which over half were characterized  
188 as core genes (present in 95% or more of the isolates; 2,150 genes; 52%). This was  
189 consistent with core genome estimates from other *S. aureus* collections (54–57). The  
190 accessory genome consisted of 1,992 genes (present in fewer than 95% of isolates),  
191 representing ~48% of the pangenome. A large proportion of the accessory genome  
192 (78%) was present in fewer than 25% of isolates (1,57/1,992 accessory genes;  
193 **Supplementary table S3**). Core and accessory genome differences were visualized  
194 in phandango (58) (**Figure S1A**). Consistent with the clonal nature of *S. aureus*,  
195 isolates grouped by accessory genome content (using poppunk) clustered similarly to  
196 the clonal frame (**Figure S1BC**) (59).

197

### 198 **Distribution of known virulence and AMR genes**

199 All *S. aureus* isolates were sampled from invasive disease cases and contained  
200 many known virulence genes, with between 50 and 69 genes identified in each  
201 isolate from the VfDB database (average: 63; update March 2021). Nearly half of  
202 these putative virulence factors were present in all isolates (35 of 79; 44%), including  
203 the genes: *adsA* (phagocytosis escape), *aur* (metalloproteinase), *geh* (lipase), *hla* ( $\alpha$ -  
204 hemolysin), *hlgAB* ( $\gamma$ -hemolysin), *hysA* (hyaluronate lysate), *icaABDR* (biofilm  
205 formation), *isdAB* (surface proteins), *lip* (lipase), *srtB* (surface protein anchor),  
206 *sspABC* (adhesion) and much of the *cap8* capsule operon (**Figure 2A**). Distribution  
207 of virulence genes between the two clinical outcome groups ("cured" and "not cured")  
208 was also considered. The methicillin resistance gene, *mecA* was more prevalent in  
209 the "not cured" outcome group (n=2/21; 9.5%) compared to the "cured" group  
210 (n=3/65; 4.6%). Also, the presence of the *bbp* gene (bone sialprotein binding)  
211 (n=20/21; 95.2% versus n=58/65; 89.2%) and *ebpS* gene (elastin binding) (n=21/21;  
212 100.0% versus n=60/65; 92.3%) were found to be more prevalent in the "not cured"  
213 outcome group than in the "cured" outcome group, but this was not statistically  
214 significant. (**Supplementary table S4**).

215

216 As most isolates were MSSA, there were very few antimicrobial resistance genes  
217 (ARGs) identified through nucleotide comparisons with the AMRfinder Plus database  
218 (**Supplementary table S5**). Differences were observed between clonal complexes  
219 for the numbers of virulence and AMR determinants (**Figure 2B**). In common with  
220 other studies, we identified slightly fewer virulence genes, but more ARGs in hospital-  
221 associated lineages. On average there were 60.3 virulence genes and 4.4 ARGs in  
222 HA lineages, compared with 63.8 virulence and 4.1 ARGs in community associated  
223 lineages. Six MSSA clones were represented by three or more isolates, of which five  
224 represented more than a third of our isolates (8 of 21; 38%) from patients who  
225 experienced a "not cured" outcome (**Figure 2C**). Two clones posed a particularly  
226 high risk to patients with 40% (2 of 5) of CC5-t002-MSSA and CC59-t216-MSSA  
227 isolates developing a "not cured" patient outcome. A quarter of patients (2 of 8)  
228 infected by CC7-t091-MSSA also experienced a "not cured" outcome, while those  
229 infected by the CC22-t005-MSSA clone all recovered.

230



231 ***Both "cured" and "not cured" isolates induced high mortality in a *Galleria****  
232 ***mellonella* model**

233 A selection of isolates (10 "not cured" and 10 "cured") were used to challenge *G.*  
234 *mellonella* larvae. Bacterial suspensions were injected into larvae (average inoculum  
235 of  $2.75 \times 10^6$  CFU/larvae; range:  $1.87 \times 10^6$  to  $4.29 \times 10^6$ ) and incubated up to 120 hours.  
236 However, high mortality was observed in a proportion of isolates in both outcome  
237 groups (**Figure 3AB**). This may not be surprising as all isolates were from infection  
238 cases, and all were found to possess at least 12 toxin genes. Further analysis of the  
239 *Galleria* virulence results identified differences between the average mortality scores  
240 when specific putative virulence genes were present (**Figure 3C**). Differences in  
241 gene content between isolates were quantified and scored using SCOARY (60). We  
242 report minus  $\log_{10}$  of the naïve p-value for the null hypothesis that the  
243 presence/absence of this gene is unrelated to the trait status ( $-\log_{10} > 2$  equivalent to  
244 naïve p-value  $< 0.01$ ). We identified four gene clusters associated with increased  
245 killing during the *Galleria* infection model (**Figure 3D**). Three of which (g01257,  
246 g01221 and g01491) demonstrated more than 90% sequence similarity with a SOS  
247 response-activated pathogenicity island shared between *S. aureus* and *S.*  
248 *epidermidis* isolates (SACOL0900-0904) (54, 61). The fourth gene cluster (g03516)  
249 identified was identical (100% nucleotide similarity over 100% of the gene) to the  
250 *msaC* gene (SACOL1438/SAUSA300\_1296). As an uncoded member of the  
251 *msaABCR* operon, this locus has an indirect role in virulence factors *aur*, *scp*, *ssp*  
252 and *spl* and contributes to increased virulence, biofilm formation and triggers the  
253 onset of bacterial persistence (62–64)(**Supplementary file S4**).

254

255 ***Isolate phenotypic variation may contribute to the onset of infection, but does***  
256 ***little to influence patient outcome***

257 We tested laboratory phenotypes associated with increased virulence and compared  
258 these with patient outcome. Individually, none of the phenotypes contributed  
259 significantly to a "not cured" patient outcome (**Table 3**). Isolates were subject to  
260 antimicrobial susceptibility profiling (29 antibiotics), biofilm formation, hemolysis  
261 activity and staphyloxanthin production (**Supplementary table S6**). No isolate was  
262 considered extensively or pan drug resistant, although 4 were considered multi-drug  
263 resistant (resistant to three or more different classes of antibiotic). More than half  
264 (n=51/86; 59.3 %) of all collected isolates were unable to form a thick biofilm under

265 laboratory conditions. Furthermore, 61.6 % (n=53/86) of all isolates produced  
266 staphyloxanthin and 39.5 % (n=34/86) showed hemolytic activity (**Table 3**). Isolates  
267 that demonstrated hemolytic activity contribute to a "cured" patient outcome ( $\geq 90\%$   
268 confidence;  $p=0.090$ , **Table 3**). Isolates that were able to produce a thick biofilm were  
269 often also able to produce staphyloxanthin (n=27/35; 77.1%; **Table 4**). However, poor  
270 biofilm forming isolates that produced staphyloxanthin (n=26/51; 51.0%) were  
271 detrimentally associated with a "not cured" patient outcome (n=15/26; 57.7%).

272

### 273 **Genes associated with different virulence phenotypes**

274 Differences in gene content between phenotypes were quantified and scored using  
275 SCOARY, reporting the minus  $\log_{10}$  of the naïve p-value for the null hypothesis that  
276 the presence/absence of this gene is unrelated to the trait status ( $-\log_{10}>2$  equivalent  
277 to naïve p-value  $<0.01$ ; **Supplementary table S7**). We identify genes associated with  
278 six different phenotypes, including patient outcome, biofilm formation, hemolysis,  
279 multi-drug resistance, methicillin resistance and staphyloxanthin production (**Figure**  
280 **4**). An uncharacterized membrane protein (g02811) and a gene from the SA97  
281 virulent bacteriophage (g03902) were associated with a "not cured" patient outcome  
282 ( $-\log_{10}>2$ ; naïve p-value  $<0.01$ ; **Figure 4A**). Genes commonly found as part of the  
283 *SCCmec* cassette (*mecA*, *paaZ*, *upgQ* and *mecRI*) were associated with methicillin  
284 resistance, and were among the gene clusters that demonstrated the strongest  
285 association with any phenotype ( $-\log_{10}>6$ ; naïve p-value  $<2 \times 10^{-7}$ ; **Figure 4B**). Several  
286 hypothetical gene clusters were associated with biofilm formation (8 genes with naïve  
287 p-value  $<0.01$ ;  $-\log_{10}>2$ ; **Figure 4C**).

288

289 The presence of several genes (27 genes with  $-\log_{10}>2$ , lowest p-value: 0.00017),  
290 including enterotoxins A and D and the collagen adhesin *cna* were associated with  
291 hemolysis production (**Figure 4D**). Despite only four isolates that were classed as  
292 MDR, the presence of 93 genes (lowest p-value:  $4.68 \times 10^{-6}$ ) were associated with  
293 phenotypically measured MDR, which included several members of the *SCCmec*  
294 cassette, the erythromycin resistance-associated *ermA* and the aminoglycoside  
295 resistance determinant, *ant1* **Figure 4E**). Several enterotoxin genes were also  
296 associated with MDR, along with the biofilm-associated gene *xerC*. The chemotaxis  
297 inhibiting gene, *chp* was the only gene associated with staphyloxanthin production in  
298 our dataset (**Figure 4F**).

299

300 **Genes linked to phenotypes that influence patient outcomes are more**  
301 **recombinogenic**

302 Finally, we investigated the role of recombination in isolates that led to a poorer  
303 patient outcome. On average, isolates that led to a "not cured" patient outcome  
304 demonstrated the highest rates of recombination (**Figure S2**). However, genomes of  
305 isolates from patients who were successfully 'cured' were predicted to have included  
306 more recombination events. This is likely influenced by a small number of highly  
307 recombinogenic genomes that were predicted to have undergone extensive  
308 recombination (**Supplementary table S8**). Genes that were associated with any of  
309 our tested phenotypes demonstrated greater clonal inheritance than genes in the  
310 core genome. Meaning that phylogenies constructed from sequences of the  
311 individual genes were consistent with the phylogeny constructed from the core  
312 genome (**Figure 4G**). The mean consistency index (CI) was significantly higher  
313 (Mann Whitney test;  $U = 78998$ ,  $p < 0.0001$ ) among virulence phenotype-associated  
314 genes ( $0.7766 \pm 0.2418$ ) compared with the average for all core genes ( $0.6943 \pm$   
315  $0.1408$ ). Taken together, the highly clonal population structure of *S. aureus* (long  
316 branches) – particularly those genes involved in virulence – and higher rates of  
317 recombination between lineages permits co-evolution of several successful  
318 hypervirulent lineages that can contribute to "not cured" patient outcomes in ODRI.

## 319 Discussion

320 Despite advances in many aspects of emergency and orthopedic trauma care, ODRI  
321 persists as a challenge for the treating physicians and a significant burden for the  
322 patient. The interaction between the host immune system and invading isolates is  
323 complex and is not only affected by variation in host and bacterial genetics, but also  
324 by factors such as host wellbeing and general health (e.g. obesity). In a similar way  
325 to how the host deploys several different types of host defense mechanisms, bacteria  
326 are armed with a toolbox of different virulence factors. We used a combination of  
327 phenotype testing, an *in vivo* infection model and *in silico* genome characterization to  
328 identify lineages and virulence factors that may contribute to the risk of poor patient  
329 outcomes following ODRI.

330

331 Isolates from patients who experienced a "not cured" outcome did not cluster by core  
332 or accessory genomes (**Figure 1A**). The most common clonal complex associated  
333 with a poor patient outcome in our collection was CC5 (50%; **Figure 1B**). CC5 is  
334 highly recombinogenic and able to infect multiple host species (65, 66) and is often  
335 isolated from human infections, particularly skin and bone infections (55, 67). While  
336 infection is often caused by MRSA, there is growing concern for the spread of  
337 hypervirulent MSSA clones (67, 68). Nearly all the isolates we collected were  
338 sensitive to methicillin and lacked a functional *SCCmec* cassette (9 of 12 CC5  
339 isolates). The gain and loss of *SCCmec* cassettes by multiple *S. aureus* clones  
340 continues to blur the differentiation of community-associated (CA) and hospital-  
341 associated (HA) *S. aureus* lineages (69, 70).

342

343 Since the emergence and epidemic spread of USA300 (CC8) clone in the early  
344 2000s (30, 71, 72), CA- lineages have dominated infection surveillance studies (19,  
345 71, 72). CA- lineages are typically thought to carry larger - more cumbersome, and  
346 less resistant - *SCCmec* types I, II and III, and often carry toxin genes such as the  
347 PVL genes. While traditional HA-*S. aureus* lineages carry smaller *SCCmec* cassettes  
348 that are more difficult to disrupt, which are maintained by successive generations.  
349 Several HA-lineages rose to prominence around the world, only to have been  
350 replaced as the most common lineages in human infections in specific regions;  
351 including the rise of CC22 in the UK and Europe (18, 73–75), and replacement of HA-  
352 MRSA-ST239 by CA-MRSA-ST59 in China (19). It has been suggested that

353 increased virulence, coupled with fewer putative AMR genes has contributed to the  
354 success of these CA-clones/lineages (31, 76). This was the case in our collection  
355 with more virulence genes and fewer ARGs found in CA-lineages compared to HA-  
356 lineages (**Figure 2B & Table S5**).

357

358 Isolates from the most common European lineage (CC22) were common among our  
359 collection of invasive isolates and were the most likely to lead to a "cured" patient  
360 outcome (**Figure 1B**). Further characterization of the specific clones in our collection  
361 identified 6 common clones, including a CC22-t005-MSSA clone that did not lead to a  
362 "not cured" patient outcome in any of the 5 patients it infected (**Figure 2C**). The five  
363 remaining clones that were identified in three or more patients were responsible for  
364 more than a third of the "not cured" patient outcomes. The CC59-t216-MSSA and  
365 CC5-t002-MSSA clones posed the highest risk, with 40% of patients infected by  
366 these clones developing a poor outcome. The CC5-t002-MRSA clone has been  
367 frequently observed, including studies from China and Iran where it exhibited  
368 extensive mupirocin resistance, MDR and contained several virulence toxins (PVL  
369 and *tsst-1*) (77, 78).

370

371 All isolates we collected were from invasive ODRI and contained at least 50 known  
372 virulence genes (**Figure 2AB**). Infection is complex and the function of any virulence  
373 gene is context dependent and a simple sum of the number of putative virulence  
374 elements is unlikely to be a good proxy for the infective potential of an isolate. All  
375 isolates in our collection were able to colonize and cause infection, but variation in  
376 additional virulence factors will influence disease progression and host evasion.  
377 Despite relatively small sample numbers, we were able to identify putative virulence-  
378 associated genes from an *in vivo* infection model and phenotypic assays, including  
379 biofilm production, antimicrobial susceptibility (and MDR), hemolysis and  
380 staphyloxanthin production.

381

382 Similar assays in *S. epidermidis* identified biofilm formation as key to establishing an  
383 ODRI through adhesion to implant surfaces (12, 43) and contributed towards a  
384 poorer clinical outcome, persistence and recurrence (8). However, this was not the  
385 case in the current study. Although 40% of the *S. aureus* isolates were able to form a  
386 strong biofilm, no clear influence on patient outcome was observed (**Table 3**). Armed

387 with a suite of extracellular toxins, *S. aureus* can often cause more severe acute  
388 infections (79), while *S. epidermidis* is often associated with less severe, chronic  
389 infection – where strong biofilm formation on implants and dead tissue may be more  
390 relevant (80–82). *In vitro* Staphyloxanthin production leads to increased pathogenicity  
391 of *S. aureus* (83, 84), and 61% of our isolates were able to produce staphyloxanthin  
392 (**Table S6**). This level of prevalence is consistent with the observation by Post *et al.*  
393 whereby 56% of 305 isolates from implant and non-implant infections were  
394 staphyloxanthin producers (85). The chemotaxis inhibitor protein (CHIPS), encoded  
395 by *chp* was the only gene we found associated with staphyloxanthin production  
396 (**Figure 4G**). CHIPS ability to help evade host immune responses pose the potential  
397 for more severe and chronic infections (86, 87). Although it was not independently  
398 associated with "not cured" in our study population.

399

400 In hypervirulent MSSA lineages and clones, increased carriage of virulence genes is  
401 balanced against limited carriage of AMR genes. We observed this in our collection,  
402 with relatively few isolates resistant to multiple antibiotics (**Figure 2B & Table S5**),  
403 and lower rates of MRSA isolates compared to other studies (7% MRSA and 10%  
404 MDR). Rates of MRSA (27% & 24%) were much higher in other studies of ODRI (10,  
405 11). Both these previous studies involved patients with a median age above 60, and  
406 patients infected with MRSA experienced lower cure rates (57%) than for MSSA-  
407 infected patients (72%) or CoNS (82%) (10). Very high rates of methicillin resistance  
408 have been observed in *S. epidermidis* ODRI isolates, which is consistent with  
409 different modes of infection between the species (73% MRSE and 76% MDR) (8).  
410 Elderly patients are more likely to suffer from infection with resistant bacteria due to  
411 repeated hospital stays and multi-morbidity (88, 89), and may partially explain the  
412 reduced number of MRSA isolates in our collection. Although only present in a small  
413 number of our isolates (n=6; 7%), methicillin resistance was associated with a "not  
414 cured" outcome (2 of 6; 33.3%; **Table 3**). This is consistent with many other studies  
415 that have highlighted the detrimental effect of methicillin resistance on treatment  
416 success (43, 55, 90).

417

418 Deep branching clades and highly structured clustering of isolates is evidence of the  
419 strong selection pressures that have driven the evolution of *S. aureus*. Distinct *S.*  
420 *aureus* lineages are found at markedly different prevalence globally, including

421 hypervirulent sub-lineages (74, 91). Waves of pandemic sub-lineages have been  
422 described within CC30 - initially MSSA, before being replaced by MRSA variants (18,  
423 19, 74). Independent acquisition of virulence determinants in these lineages was  
424 associated with the rise and fall of these lineages and horizontal gene transfer (HGT)  
425 likely has an important role in the accumulation of virulence factors. This lineage  
426 specific accumulation of virulence genes makes traditional identification of virulence  
427 factors difficult. Genome-wide association studies that can account for these lineage  
428 effects (43, 44, 90, 92), or can differentiate between the types of association, are  
429 potentially useful (93). Furthermore, the inclusion of the pangenome analyses  
430 (including mobile elements and intergenic regions) and covarying SNPs and genes  
431 (epistasis) (94, 95), combined with appropriate phenotypic validation and/or  
432 transcriptome profiling will greatly enhance understanding of the contribution of  
433 pathogen genetic variation on disease progression (49).

434

435 Infection is clearly a complex process influenced by the host immune system and  
436 genotypic variation within the invading pathogen. Here, we only tested a single *S.*  
437 *aureus* colony from each patient. However, there can be considerable diversity  
438 among the commensal and infective isolates within a single person (96–99). Small  
439 colony variants (SCV) (100, 101), persistence (102, 103) and dormancy (104, 105)  
440 also help protect invading cells from the host immune system and evade  
441 antimicrobial treatment. While the isolates collected here have already colonized host  
442 subcutaneous tissue and established an infection, our aim was to delineate factors  
443 that contribute to poorer patient outcomes. Our results are consistent with a complex  
444 balance between virulence and colonization (32), involving core and accessory  
445 genome elements, and provide some evidence that characterization of common  
446 emerging clones and lineages may help disease outcome prediction.

## 447 **Materials and methods**

448

### 449 ***Clinical data and Staphylococcus aureus collection***

450 The clinical data and *S. aureus* collection was part of a prospective study performed  
451 between November 2011 and September 2013 at BGU Murnau in Germany (12)  
452 which was approved by the local ethical committee *Ethik-Kommission der*  
453 *Bayerischen Landesärztekammer* under approval number 12063 and registered with  
454 <https://clinicaltrials.gov> with identifier NCT02971657. All patients enrolled in the study  
455 were aged 18 or older and provided informed written consent. Patient inclusion  
456 criteria were culture-positive *S. aureus* infection involving fracture related infection  
457 (FRI) or periprosthetic joint infections (PJI). All patient details were anonymized, and  
458 *S. aureus* isolates given genome database identifiers (BIGSids), study identifiers  
459 (ARI-number) and sample laboratory identifiers (Lab-ID). Associated clinical data are  
460 summarized in **Table S1**. After an average of 23 months follow-up (FUP) patients  
461 were assessed for treatment outcome. When patients did not complete a follow-up  
462 appointment, the clinical outcome was assessed at the time of hospital discharge.  
463 "Cured" patients were free of infection, surgical and systemic antibiotic therapy had  
464 ceased with function of the affected joint or limb restored. If one or more of these  
465 parameters were negative, patients were considered to have had a "not cured"  
466 outcome (8, 12).

467

### 468 ***Genome sequencing and assembly***

469 *S. aureus* colonies were cultured in 5 ml Tryptone Soy Broth at 37 °C with overnight  
470 shaking. DNA was extracted using the QIAamp DNA Mini Kit (Qiagen, Germany)  
471 according to manufacturer's instructions with the addition of 1.5 µg/µL lysostaphin  
472 (Sigma-Aldrich, Buchs, Switzerland) and 2 µg/ml lysozyme (Sigma-Aldrich, Buchs,  
473 Switzerland) to facilitate cell lysis. DNA was quantified using a spectrophotometer  
474 prior to sending for sequencing by Microsynth AG (Switzerland) using an Illumina  
475 MiSeq benchtop sequencer. Sequencing libraries were prepared using Nextera XT  
476 library preparation kits (v2) and paired end 250 bp reads generated with the MiSeq  
477 run kit (v2). Short read paired-end data was assembled *de novo* with SPAdes  
478 (version 3.3.0; using the *-careful* command)(106) and assessed for quality (n=86  
479 genomes contained < 500 contigs). Average assembled genomes were 2,771,938 bp



480 in length (range: 2,638,312 - 2,962,075 bp) consisting of 113 contigs (range: 29 –  
481 358 contigs) with an N50 of 43,492 bp (range: 5,729 – 109,980) (**Table S2**).

482

### 483 ***Genome archiving, multiple genome alignments and construction of isolate*** 484 ***genealogies***

485 An alignment of all 86 *S. aureus* isolates was constructed from concatenated gene  
486 sequences of all core genes (found in ≥95% isolates) using MAFFT (version 7)(107)  
487 on a gene-by-gene basis (size: 2,138,455 bp; **Supplementary file 1**). A maximum-  
488 likelihood phylogenies were constructed using a GTR + I + G substitution model and  
489 ultra-fast bootstrapping (1,000 bootstraps) implemented in IQ-TREE (version  
490 2.0.3)(108, 109) and visualized on Microreact: [https://microreact.org/project/Post-](https://microreact.org/project/Post-Pascoe-Saureus/0f0c26fb)  
491 [Pascoe-Saureus/0f0c26fb](https://microreact.org/project/Post-Pascoe-Saureus/0f0c26fb) (**Supplementary file S3**) (110). Collection also shared on  
492 the pathogen watch website ([https://pathogen.watch/collection/7rgjyrzz3xoc-post-](https://pathogen.watch/collection/7rgjyrzz3xoc-post-and-pascoe-et-al-2022-hypervirulent-mssa-from-odri)  
493 [and-pascoe-et-al-2022-hypervirulent-mssa-from-odri](https://pathogen.watch/collection/7rgjyrzz3xoc-post-and-pascoe-et-al-2022-hypervirulent-mssa-from-odri)).

494

### 495 ***Molecular typing and genome characterization***

496 Our publicly available BIGSdb database (<https://sheppardlab.com/resources/>)  
497 includes functionality to determine multi-locus sequence type (MLST) profiles defined  
498 by the Staphylococcal pubMLST database (<https://pubmlst.org/saureus>; accessed  
499 March 2019) (111). Staphopia (version 1.0.0) was used to define *SCCmec* types  
500 (112) and *spa* types were typed *in silico* using spaTyper v1.0 (**Supplementary table**  
501 **S2**) (113).

502

### 503 ***Care and accessory genome characterization***

504 All unique genes present in at least one of our isolates (or eight reference strains)  
505 were identified by automated annotation using PROKKA (version 1.13) followed by  
506 PIRATE, a pangenomics tool that allows for orthologue gene clustering in bacteria  
507 (**Supplementary table S3; Supplementary file S3**). Genes families in PIRATE were  
508 defined using a wide range of amino acid percentage sequence identity thresholds  
509 for Markov Cluster algorithm (MCL) clustering (45, 50, 60, 70, 80, 90, 95, 98). Core  
510 genes were defined as present in 95% of the genomes and accessory genes as  
511 present in at least one isolate (**Supplementary figure S1A**). The pangenome was  
512 visualized using phandango, as a matrix of gene presence alongside a core genome  
513 phylogeny (58). Pairwise core and accessory genome distances were compared

514 using PopPunk (version 1.1.4), which uses pairwise nucleotide k-mer comparisons to  
515 distinguish shared sequence and gene content to identify divergence of the  
516 accessory genome in relation to the core genome. A two-component Gaussian  
517 mixture model was used to construct a network to define clusters and visualized with  
518 microreact (**Supplementary figure S1BC**) (59, 110).

519

#### 520 ***Identification of known virulence traits and antimicrobial resistance genes***

521 The presence of putative virulence factors and antimicrobial resistance genes were  
522 identified from assembled genomes using ABRICATE (v0.3) (59). Putative virulence  
523 genes were detected through comparison with reference nucleotide sequences in the  
524 VfDb (default settings:  $\geq 70\%$  identity over  $\geq 50\%$  of the gene; **Supplementary table**  
525 **S4**) (114). Antimicrobial resistance genes were identified using the NCBI AMRfinder  
526 Plus (115) and CARD (116) databases (19<sup>th</sup> April, 2020 update). Results for both  
527 AMR databases were similar, with the CARD database identifying additional AMR  
528 associated genes. We report the results from the curated AMRfinder Plus database  
529 (**Supplementary table S5**).

530

#### 531 ***Phenotype testing***

532 ***Antibiotic susceptibility testing:*** Minimum inhibitory concentrations (MICs) for 29  
533 antibiotics were determined using a Vitek2 machine (bioMérieux Vitek Inc., USA) as  
534 described previously (8, 12). Susceptibility breakpoints were defined according to the  
535 definitions of the European Committee of Antimicrobial Susceptibility Testing  
536 (EUCAST) and isolates resistant to 3 or more antimicrobial classes were defined as  
537 multidrug resistant (MDR)(118). The Vitek2 results for oxacillin and cefoxitin were  
538 used as a proxy for methicillin-resistance. ***Staphyloxanthin production:***  
539 Staphyloxanthin production indicated by a yellow-orange pigmentation of *S. aureus*  
540 colonies as well as ***Haemolysin activity:*** Haemolysis activity of *S. aureus* strains  
541 was evaluated as previously described (119). ***Biofilm formation:*** was also assayed  
542 as described previously (8, 12, 85, 120). Association amongst and between the  
543 clinical parameters, bacterial phenotypes, clades and presence/absence of genes  
544 were analyzed statistically using Chi-square test. Statistical analyses were performed  
545 using SPSS (Version 23, IBM, USA) or GraphPad prism 6 (GraphPad Software, Inc.;  
546 **Supplementary table S6**).

547

548 ***In vivo virulence and survival assay in Galleria mellonella larvae:*** The  
549 invertebrate *G. mellonella* infection model was used to study the virulence of the *S.*  
550 *aureus* strains as previously described (121, 122). *G. mellonella* were obtained at  
551 pre-larval stage (Entomos AG, Zurich Switzerland). Larvae were grown at 30 °C in  
552 the dark and groups of ten larvae in the final instar larval stage weighing 200–  
553 400 mg were used in all assays. A bacterial suspension of 10<sup>6</sup> CFU/ml was  
554 prepared. Quantitative culture of a sample from each bacterial suspension was  
555 performed immediately after preparation by ten-fold serial dilution and plating on  
556 Tryptone Soy Agar plates to check the actual total viable count of the prepared  
557 suspension. Bacterial inoculates (10 µl) were injected into the last left pro-leg into the  
558 hemocoel of the last-instar larvae (200-400 mg). After injection, larvae were  
559 incubated at 37 °C in the dark. Larvae were assessed daily for survival up to 5 days  
560 post-injection and were evaluated according to survival, being scored as dead when  
561 they displayed no movement in response to touch. Controls included a group of  
562 larvae that did not receive any injection and a group of larvae inoculated with sterile  
563 phosphate-buffered saline (PBS). Experiments consisted of 10 larvae per bacterial  
564 strain, which was repeated in three separate experiments. For *G. mellonella* survival  
565 analysis, larvae mean survival curves were plotted using the Kaplan-Meier method  
566 (GraphPad Prism 6, USA; **Supplementary table S6**).

567

#### 568 ***Pan-genome-wide association studies of phenotype variation***

569 Pangenome-wide differences in gene presence were quantified using the genome-  
570 wide association software, SCOARY (version 1.6.14)(60). With only limited numbers  
571 of samples in our collection, we report phylogenetically naïve differences in gene  
572 presence between clinical and laboratory symptoms and phenotypes  
573 (**Supplementary table S7**).

574

#### 575 **Recombination and allelic consistency**

576 The number of polymorphisms introduced by mutation and recombination in the core  
577 genome were inferred using Gubbins (version 2.4.1)(123) for each isolate (per  
578 branch; **Supplementary table S8**). The consistency of the phylogenetic tree to  
579 patterns of variation in sequence alignments for each gene of interest was calculated  
580 as before (124, 125). Consistency indices for each single-gene alignment of 130  
581 virulence-associated genes to a phylogeny constructed using an alignment of 2,150

582 core genes shared by 94 isolates, were calculated using the CI function of the R  
583 Phangorn package (126).

584

#### 585 **Data availability**

586 Illumina short read sequence data are archived on the Sequence Read Archive  
587 associated with BioProject accession PRJNA529795. All assembled genomes are  
588 shared on figshare (doi: 10.6084/m9.figshare.7926866) and are available on our  
589 public Staphylococcal Bacterial Isolate Genome Sequence Database (BIGSdb):  
590 <https://sheppardlab.com/resources/>. Isolate genealogy with associated meta-data is  
591 visualized on microreact (110): [https://microreact.org/project/Post-Pascoe-](https://microreact.org/project/Post-Pascoe-Saureus/0f0c26fb)  
592 [Saureus/0f0c26fb](https://microreact.org/project/Post-Pascoe-Saureus/0f0c26fb). All high-performance computing was performed on MRC CLIMB  
593 (127) in a bioconda environment (128).

594

## 595 **Acknowledgements**

596 This work was funded by AO Trauma as part of the Clinical Priority Program, Bone  
597 Infection. All high-performance computing was performed on MRC CLIMB, funded by  
598 the Medical Research Council (MR/L015080/1 & MR/T030062/1). This publication  
599 made use of the PubMLST website (<http://pubmlst.org/>) developed by Keith Jolley  
600 and Martin Maiden (129) and sited at the University of Oxford. The development of  
601 that website was funded by the Wellcome Trust. The funders had no role in study  
602 design, data collection and interpretation, or the decision to submit the work for  
603 publication.

604

605 All authors report no conflicts of interest relevant to this article.

606

## 607 **Contributions**

608 Conceptualization: VP, BP, SKS, and TFM; Isolate collection: VP, CE, JF, MM, and  
609 TFM; Data collection and curation: VP, BP, MDH and SKS; Formal Analysis: VP, BP,  
610 EM, JKC; Visualization: VP, BP, EM, JKC; Writing – original draft: VP, BP, SKS and  
611 TFM; Writing – Review & Editing: VP, BP, SKS and TFM; Funding Acquisition: VP,  
612 RGR and TFM.

613

## 614 **Figures and Table legends**

615 **Table 1:** Collection overview.

616 **Table 2:** Patient risk factors.

617 **Table 3:** Infection isolate prognostic phenotypes.

618 **Table 4:** Phenotype associations in combination with enhanced biofilm formation.

619

## 620 **Figure 1:**

621 **Population structure of *S. aureus* isolates collected in this study. A:** A  
622 maximum-likelihood phylogeny was constructed with IQ-TREE, using a GTR model  
623 and ultrafast bootstrapping (1000 bootstraps; version 2.0.3)(108, 109) from an  
624 alignment of all isolates (n=86). Scale bar represents a genetic distance of 0.001.  
625 Leaves from isolates that were "cured" are white (n=65) and those that did not  
626 achieve a "cured" status are black (n=21). The tree is annotated with MLST, clonal  
627 complex, methicillin resistance status, *SCCmec* and *spa* types and the presence of  
628 PVL genes (indicated by colored blocks). Isolates from hospital associated lineages

629 are highlighted in blue. Interactive visualization is available on Microreact (110):  
630 <https://microreact.org/project/Post-Pascoe-Saureus/0f0c26fb>. The number of isolates  
631 from each (**B**) MLST clonal complexes (CC) and (**C**) methicillin resistant (MRSA) and  
632 methicillin susceptible (MSSA) lineages. The proportion of isolates that lead to a "not  
633 cured" status is shown in black.

634

635 **Figure 2:**

636 **Hypervirulent lineages and clones. A:** Maximum-likelihood phylogeny of our 86 *S.*  
637 *aureus* isolates above matrix of defined virulence factors identified using the VfDb  
638 (114). Summary boxplots of the number of virulence and antimicrobial resistance  
639 genes (ARGs) identified in each (**B**) clonal complex and (**C**) MSSA clone  
640 (represented by 3 or more isolates). All data points shown, bars show min and max.  
641 Hospital-associated lineages and clones highlighted in blue. The number of isolates  
642 from each MSSA clone is also shown, with the proportion of isolates from patients  
643 who did not achieve a "cured" status in black.

644

645 **Figure 3:**

646 ***Galleria mellonella* virulence model.** Kaplan-Meier survival curve of larvae infected  
647 with *S. aureus* isolates from **A:** "not cured" outcome patients and from **B:** "cured"  
648 outcome patients. Each line represents a different *S. aureus* isolate injected into 10  
649 larvae per isolate. Mean survival rate was calculated per isolate. Dotted line  
650 represents survival of larvae injected with PBS; green line represents high survival  
651 rate and red line indicates a high mortality rate. **C:** Mean kill curve scores from  
652 isolates that contained each virulence factor identified by VfDb. **D:** Pangenome-wide  
653 association study comparing isolates with high kill score (above 50% at 120 hrs) vs  
654 those with low kills scores using SCOARY (60). No lineage correction was used and  
655 the phylogenetically naïve minus LOG p-value reported. Three genes from previously  
656 identified pathogenicity island and *msaC* gene from the *msaABCR* operon were  
657 associated with increased killing.

658

659 **Figure 4:**

660 **Pangenome-wide association studies.** SCOARY was used to quantify gene  
661 presence between isolates tested for six targeted virulence phenotypes (60). No  
662 lineage correction was used, and the phylogenetically naïve minus LOG p-value

663 reported. Isolates were scored for phenotypic differences in **(A)** patient outcome; **(B)**  
664 methicillin resistance; **(C)** biofilm formation; **(D)** hemolysis; **(E)** multidrug resistance;  
665 and **(F)** staphyloxanthin production. Genes that were highly associated with a given  
666 phenotype are labelled. Multiple toxin (blue circles) and *SCCmec* cassette (red  
667 circles) genes were associated with more than one phenotype. **(G)** Individual gene  
668 phylogenies were compared to a core phylogeny for each virulence phenotype-  
669 associated gene and consistency indices calculated. The two distributions were  
670 significantly different (Mann Whitney test;  $U = 78998$ ,  $p < 0.0001$ ) between virulence  
671 phenotype-associated genes ( $0.7766 \pm 0.2418$ ) compared with the average for all  
672 core genes ( $0.6943 \pm 0.1408$ ).

673

674 **Supplementary material** (figshare: <https://doi.org/10.6084/m9.figshare.7926866>)

675 **Table S1:** Demographic data collected for each isolate.

676 **Table S2:** Genome quality control and extended typing results.

677 **Table S3:** Summary of core and accessory genome characterization with PIRATE.

678 **Table S4:** Summary of genes identified by screening known virulence genes with the  
679 VfDB.

680 **Table S5:** Summary of genes identified by screening antibiotic resistance genes with  
681 the AMRfinder (NCBI) and CARD databases.

682 **Table S6:** Summary of virulence phenotype data.

683 **Table S7:** Summary of genes associated with virulence phenotypes (SCOARY).

684 **Table S8:** Per isolate recombination statistics using Gubbins.

685

686 **Figure S1:** Accessory genome characterization.

687 **Figure S2:** Recombination analysis.

688

689 **Supplementary file 1:** Contigs

690 **Supplementary file 2:** Alignment.

691 **Supplementary file 3:** Phylogeny (.nwk) of 86 collected isolates.

692 **Supplementary file 4:** PIRATE pangenome gene families.

693

## 694 **References**

- 695 1. Tschudin-Sutter S, Frei R, Dangel M, Jakob M, Balmelli C, Schaefer DJ,  
696 Weisser M, Elzi L, Battegay M, Widmer AF. 2016. Validation of a treatment  
697 algorithm for orthopaedic implant-related infections with device-retention—  
698 results from a prospective observational cohort study. *Clin Microbiol Infect*  
699 22:457.e1-457.e9.
- 700 2. Zimmerli W. 2014. Clinical presentation and treatment of orthopaedic implant-  
701 associated infection. *J Intern Med*.
- 702 3. Moriarty TF, Kuehl R, Coenye T, Metsemakers W-JJ, Morgenstern M, Schwarz  
703 EM, Riool M, Zaat SAJJ, Khana N, Kates SL, Geoff Richards R, Richards RG.  
704 2016. Orthopaedic device-related infection: Current and future interventions for  
705 improved prevention and treatment. *EFORT Open Rev* 1:89–99.
- 706 4. Li B, Webster TJ. 2018. Bacteria antibiotic resistance: New challenges and  
707 opportunities for implant-associated orthopedic infections. *J Orthop Res* 36:22–  
708 32.
- 709 5. PATZAKIS MJ, WILKINS J. 1989. Factors Influencing Infection Rate in Open  
710 Fracture Wounds. *Clin Orthop Relat Res* 243.
- 711 6. Boxma H, Broekhuizen T, Patka P, Oosting H. 1996. Randomised controlled  
712 trial of single-dose antibiotic prophylaxis in surgical treatment of closed  
713 fractures: The Dutch Trauma Trial. *Lancet* 347:1133–1137.
- 714 7. Spiegl U, Friederichs J, Pätzold R, Militz M, Josten C, Bühren V. 2013. Risk  
715 factors for failed two-stage procedure after chronic posttraumatic periprosthetic  
716 hip infections. *Arch Orthop Trauma Surg* 133:421–428.
- 717 8. Morgenstern M, Post V, Erichsen C, Hungerer S, Bühren V, Militz M, Richards  
718 RG, Moriarty TF. 2016. Biofilm formation increases treatment failure in  
719 *Staphylococcus epidermidis* device-related osteomyelitis of the lower extremity  
720 in human patients. *J Orthop Res* 34:1905–1913.
- 721 9. Guo G, Wang J, You Y, Tan J, Shen H. 2017. Distribution characteristics of  
722 *Staphylococcus* spp. in different phases of periprosthetic joint infection: A  
723 review. *Exp Ther Med* 13:2599.
- 724 10. Teterycz D, Ferry T, Lew D, Stern R, Assal M, Hoffmeyer P, Bernard L, Uçkay  
725 I. 2010. Outcome of orthopedic implant infections due to different  
726 staphylococci. *Int J Infect Dis* 14.
- 727 11. Kilgus DJ, Howe DJ, Strang A. 2002. Results of Periprosthetic Hip and Knee



- 728 Infections Caused by Resistant Bacteria. *Clin Orthop Relat Res* 404:116–124.
- 729 12. Post V, Harris LG, Morgenstern M, Mageiros L, Hitchings MD, Méric G, Pascoe  
730 B, Sheppard SK, Richards RG, Moriarty TF. 2017. Comparative Genomics  
731 Study of *Staphylococcus epidermidis* Isolates from Orthopedic-Device-Related  
732 Infections Correlated with Patient Outcome. *J Clin Microbiol* 55:3089–3103.
- 733 13. Arciola CR, An YH, Campoccia D, Donati ME, Montanaro L. 2005. Etiology of  
734 implant orthopedic infections: A survey on 1027 clinical isolates. *Int J Artif*  
735 *Organs* 28:1091–1100.
- 736 14. Campoccia D, Montanaro L, Arciola CR. 2006. The significance of infection  
737 related to orthopedic devices and issues of antibiotic resistance. *Biomaterials*  
738 27:2331–2339.
- 739 15. Montanaro L, Ravaioli S, Ruppitsch W, Campoccia D, Pietrocola G, Visai L,  
740 Speziale P, Allerberger F, Arciola CR. 2016. Molecular characterization of a  
741 prevalent ribocluster of methicillin-sensitive *Staphylococcus aureus* from  
742 Orthopedic implant infections. Correspondence with MLST CC30. *Front Cell*  
743 *Infect Microbiol* 6:8.
- 744 16. Otto M. 2012. Methicillin-resistant *Staphylococcus aureus* infection is  
745 associated with increased mortality. <http://dx.doi.org/102217/fmb11156> 7:189–  
746 191.
- 747 17. Zhuang H, Zhu F, Lan P, Ji S, Sun L, Chen Y, Wang Z, Jiang S, Zhang L, Zhu  
748 Y, Jiang Y, Chen Y, Yu Y. 2021. A random forest model based on core genome  
749 allelic profiles of mrsa for penicillin plus potassium clavulanate susceptibility  
750 prediction. *Microb Genomics* 7:000610.
- 751 18. Chambers HF, DeLeo FR. 2009. Waves of Resistance: *Staphylococcus aureus*  
752 in the Antibiotic Era. *Nat Rev Microbiol* 7:629.
- 753 19. Chen H, Yin Y, van Dorp L, Shaw LP, Gao H, Acman M, Yuan J, Chen F, Sun  
754 S, Wang X, Li S, Zhang Y, Farrer RA, Wang H, Balloux F. 2021. Drivers of  
755 methicillin-resistant *Staphylococcus aureus* (MRSA) lineage replacement in  
756 China. *Genome Med* 13:1–14.
- 757 20. Harkins CP, Pichon B, Doumith M, Parkhill J, Westh H, Tomasz A, de  
758 Lencastre H, Bentley SD, Kearns AM, Holden MTG. 2017. Methicillin-resistant  
759 *Staphylococcus aureus* emerged long before the introduction of methicillin into  
760 clinical practice. *Genome Biol* 18:1–11.
- 761 21. Enright MC, Day NPJ, Davies CE, Peacock SJ, Spratt BG. 2000. Multilocus

- 762 sequence typing for characterization of methicillin-resistant and methicillin-  
763 susceptible clones of *Staphylococcus aureus*. *J Clin Microbiol* 38:1008–1015.
- 764 22. Feil EJ, Cooper JE, Grundmann H, Robinson DA, Enright MC, Berendt T,  
765 Peacock SJ, Smith JM, Murphy M, Spratt BG, Moore CE, Day NPJ. 2003. How  
766 clonal is *Staphylococcus aureus*? *J Bacteriol* 185:3307–3316.
- 767 23. Urwin R, Maiden MCJ. 2003. Multi-locus sequence typing: a tool for global  
768 epidemiology. *Trends Microbiol* 11:479–487.
- 769 24. Tenover FC, Goering R V. 2009. Methicillin-resistant *Staphylococcus aureus*  
770 strain USA300: origin and epidemiology. *J Antimicrob Chemother* 64:441–446.
- 771 25. Ito T, Hiramatsu K, Oliveira DC, De Lencastre H, Zhang K, Westh H, O'Brien F,  
772 Giffard PM, Coleman D, Tenover FC, Boyle-Vavra S, Skov RL, Enright MC,  
773 Kreiswirth B, Kwan SK, Grundmann H, Laurent F, Sollid JE, Kearns AM,  
774 Goering R, John JF, Daum R, Soderquist B. 2009. Classification of  
775 staphylococcal cassette chromosome mec (SCCmec): Guidelines for reporting  
776 novel SCCmec elements. *Antimicrob Agents Chemother* 53:4961–4967.
- 777 26. Strommenger B, Bräulke C, Heuck D, Schmidt C, Pasemann B, Nübel U, Witte  
778 W. 2008. spa Typing of *Staphylococcus aureus* as a Frontline Tool in  
779 Epidemiological Typing. *J Clin Microbiol* 46:574.
- 780 27. Koeck M, Como-Sabetti K, Boxrud D, Dobbins G, Glennen A, Anacker M,  
781 Jawahir S, See I, Lynfield R. 2019. Burdens of Invasive Methicillin-Susceptible  
782 and Methicillin-Resistant *Staphylococcus aureus* Disease, Minnesota, USA.  
783 *Emerg Infect Dis* 25:171.
- 784 28. David MZ, Boyle-Vavra S, Zychowski DL, Daum RS. 2011. Methicillin-  
785 Susceptible *Staphylococcus aureus* as a Predominantly Healthcare-Associated  
786 Pathogen: A Possible Reversal of Roles? *PLoS One* 6.
- 787 29. Otto M. 2013. Community-associated MRSA: What makes them special? *Int J*  
788 *Med Microbiol* 303:324–330.
- 789 30. Uhlemann AC, Otto M, Lowy FD, DeLeo FR. 2014. Evolution of community-  
790 and healthcare-associated methicillin-resistant *Staphylococcus aureus*. *Infect*  
791 *Genet Evol* 21:563–574.
- 792 31. Laabei M, Uhlemann AC, Lowy FD, Austin ED, Yokoyama M, Ouadi K, Feil E,  
793 Thorpe HA, Williams B, Perkins M, Peacock SJ, Clarke SR, Dordel J, Holden  
794 M, Votintseva AA, Bowden R, Crook DW, Young BC, Wilson DJ, Recker M,  
795 Massey RC. 2015. Evolutionary Trade-Offs Underlie the Multi-faceted

- 796 Virulence of *Staphylococcus aureus*. *PLOS Biol* 13:e1002229.
- 797 32. Sheppard SK. 2022. Strain wars and the evolution of opportunistic pathogens.  
798 *Curr Opin Microbiol* 67.
- 799 33. Otto M. 2012. MRSA virulence and spread. *Cell Microbiol* 14:1513–1521.
- 800 34. Otto M. 2010. Basis of virulence in community-associated methicillin-resistant  
801 *Staphylococcus aureus*. *Annu Rev Microbiol* 64:143–162.
- 802 35. Archer GL. 1998. *Staphylococcus aureus*: a well-armed pathogen. *Clin Infect*  
803 *Dis* 26:1179–1181.
- 804 36. Arciola CR, Visai L, Testoni F, Arciola S, Campoccia D, Speziale P, Montanaro  
805 L. 2011. Concise survey of *Staphylococcus aureus* virulence factors that  
806 promote adhesion and damage to peri-implant tissues. *Int J Artif Organs*  
807 34:771–780.
- 808 37. Lina G, Quaglia A, Reverdy ME, Leclercq R, Vandenesch F, Etienne J. 1999.  
809 Distribution of genes encoding resistance to macrolides, lincosamides, and  
810 streptogramins among staphylococci. *Antimicrob Agents Chemother* 43:1062–  
811 1066.
- 812 38. Mehrotra M, Wang G, Johnson WM. 2000. Multiplex PCR for detection of  
813 genes for *Staphylococcus aureus* enterotoxins, exfoliative toxins, toxic shock  
814 syndrome toxin 1, and methicillin resistance. *J Clin Microbiol* 38:1032–1035.
- 815 39. Kobras CM, Fenton AK, Sheppard SK. 2021. Next-generation microbiology:  
816 from comparative genomics to gene function. *Genome Biol* 2021 22:1–16.
- 817 40. Sheppard SK, Guttman DS, Fitzgerald JR. 2018. Population genomics of  
818 bacterial host adaptation. *Nat Rev Genet* 19:549–565.
- 819 41. Méric G, Yahara K, Mageiros L, Pascoe B, Maiden MCJ, Jolley KA, Sheppard  
820 SK. 2014. A reference pan-genome approach to comparative bacterial  
821 genomics: Identification of novel epidemiological markers in pathogenic  
822 *Campylobacter*. *PLoS One* 9.
- 823 42. Recker M, Laabei M, Toleman MS, Reuter S, Saunderson RB, Blane B, Török  
824 ME, Ouadi K, Stevens E, Yokoyama M, Steventon J, Thompson L, Milne G,  
825 Bayliss S, Bacon L, Peacock SJ, Massey RC. 2017. Clonal differences in  
826 *Staphylococcus aureus* bacteraemia-associated mortality. *Nat Microbiol*  
827 2:1381–1388.
- 828 43. Méric G, Mageiros L, Pensar J, Laabei M, Yahara K, Pascoe B, Kittiwon N,  
829 Tadee P, Post V, Lamble S, Bowden R, Bray JE, Morgenstern M, Jolley KA,

- 830 Maiden MCJ, Feil EJ, Didelot X, Miragaia M, de Lencastre H, Moriarty TF,  
831 Rohde H, Massey RC, Mack D, Corander J, Sheppard SK. 2018. Disease-  
832 associated genotypes of the commensal skin bacterium *Staphylococcus*  
833 *epidermidis*. *Nat Commun* 9.
- 834 44. Laabei M, Recker M, Rudkin JK, Aldeljawi M, Gulay Z, Sloan TJ, Williams P,  
835 Endres JL, Bayles KW, Fey PD, Yajjala VK, Widhelm T, Hawkins E, Lewis K,  
836 Parfett S, Scowen L, Peacock SJ, Holden M, Wilson D, Read TD, Van Den  
837 Elsen J, Priest NK, Feil EJ, Hurst LD, Josefsson E, Massey RC. 2014.  
838 Predicting the virulence of MRSA from its genome sequence. *Genome Res*  
839 24:839–849.
- 840 45. Gordon NC, Price JR, Cole K, Everitt R, Morgan M, Finney J, Kearns AM,  
841 Pichon B, Young B, Wilson DJ, Llewelyn MJ, Paul J, Peto TEA, Crook DW,  
842 Walker AS, Golubchik T. 2014. Prediction of *staphylococcus aureus*  
843 antimicrobial resistance by whole-genome sequencing. *J Clin Microbiol*  
844 52:1182–1191.
- 845 46. Berthenet E, Yahara K, Thorell K, Pascoe B, Meric G, Mikhail JM, Engstrand L,  
846 Enroth H, Burette A, Megraud F, Varon C, Atherton JC, Smith S, Wilkinson TS,  
847 Hitchings MD, Falush D, Sheppard SK. 2018. A GWAS on *Helicobacter pylori*  
848 strains points to genetic variants associated with gastric cancer risk. *BMC Biol*  
849 <https://doi.org/10.1186/s12915-018-0550-3>.
- 850 47. Hwang W, Yong JH, Min KB, Lee KM, Pascoe B, Sheppard SK, Yoon SS.  
851 2021. Genome-wide association study of signature genetic alterations among  
852 *pseudomonas aeruginosa* cystic fibrosis isolates. *PLoS Pathog* 17.
- 853 48. Peters S, Pascoe B, Wu Z, Bayliss SC, Zeng X, Edwinson A, Veerabadhran-  
854 Gurunathan S, Jawahir S, Calland JK, Mourkas E, Patel R, Wiens T, Decuir M,  
855 Boxrud D, Smith K, Parker CT, Farrugia G, Zhang Q, Sheppard SK, Grover M.  
856 2021. *Campylobacter jejuni* genotypes are associated with post-infection  
857 irritable bowel syndrome in humans. *Commun Biol* 4.
- 858 49. Sassi M, Bronsard J, Pascreau G, Emily M, Donnio P-Y, Revest M, Felden B,  
859 Wirth T, Augagneur Y. 2022. Forecasting *Staphylococcus aureus* Infections  
860 Using Genome-Wide Association Studies, Machine Learning, and  
861 Transcriptomic Approaches. *mSystems*  
862 <https://doi.org/10.1128/MSYSTEMS.00378-22>.
- 863 50. Aanensen DM, Feil EJ, Holden MTG, Dordel J, Yeats CA, Fedosejev A, Goater

- 864 R, Castillo-Ramírez S, Corander J, Colijn C, Chlebowicz MA, Schouls L, Heck  
865 M, Pluister G, Ruimy R, Kahlmeter G, Åhman J, Matuschek E, Friedrich AW,  
866 Parkhill J, Bentley SD, Spratt BG, Grundmann J, Krziwanek K, Stumvoll S,  
867 Koller W, Denis O, Struelens M, Nashev D, Budimir A, Kalenic S, Pieridou-  
868 Bagatzouni D, Jakubu V, Zemlickova H, Westh H, Larsen AR, Skov R, Laurent  
869 F, Ettienne J, Strommenger B, Witte W, Vourli S, Vatopoulos A, Vainio A,  
870 Vuopio-Varkila J, Fuzi M, Ungvári E, Murchan S, Rossney A, Miklasevics E,  
871 Balode A, Haraldsson G, Kristinsson KG, Monaco M, Pantosti A, Borg M, Van  
872 Santen-Verheuver M, Huijsdens X, Marstein L, Jacobsen T, Simonsen GS,  
873 Airesde-Sousa M, De Lencastre H, Luczak-Kadlubowska A, Hryniewicz W,  
874 Straut M, Codita I, Perez-Vazquez M, Iglesias JO, Spik VC, Mueller-Premru M,  
875 Haeggman S, Olsson-Liljequist B, Ellington M, Kearns A. 2016. Whole-genome  
876 sequencing for routine pathogen surveillance in public health: A population  
877 snapshot of invasive *Staphylococcus aureus* in Europe. *MBio* 7.
- 878 51. Garvey MI, Bradley CW, Holden KL, Oppenheim B. 2017. Outbreak of clonal  
879 complex 22 Panton-Valentine leucocidin-positive methicillin-resistant  
880 *Staphylococcus aureus*. *J Infect Prev* 18:224–230.
- 881 52. de Vos AS, de Vlas SJ, Lindsay JA, Kretzschmar MEE, Knight GM. 2021.  
882 Understanding MRSA clonal competition within a UK hospital; the possible  
883 importance of density dependence. *Epidemics* 37:100511.
- 884 53. SC B, HA T, NM C, SK S, EJ F. 2019. PIRATE: A fast and scalable  
885 pangenomics toolbox for clustering diverged orthologues in bacteria.  
886 *Gigascience* 8.
- 887 54. Méric G, Miragaia M, De Been M, Yahara K, Pascoe B, Mageiros L, Mikhail J,  
888 Harris LG, Wilkinson TS, Rolo J, Lamble S, Bray JE, Jolley KA, Hanage WP,  
889 Bowden R, Maiden MCJ, Mack D, De Lencastre H, Feil EJ, Corander J,  
890 Sheppard SK. 2015. Ecological overlap and horizontal gene transfer in  
891 *Staphylococcus aureus* and *Staphylococcus epidermidis*. *Genome Biol Evol* 7.
- 892 55. Manara S, Pasolli E, Dolce D, Ravenni N, Campana S, Armanini F, Asnicar F,  
893 Mengoni A, Galli L, Montagnani C, Venturini E, Rota-Stabelli O, Grandi G,  
894 Taccetti G, Segata N. 2018. Whole-genome epidemiology, characterisation,  
895 and phylogenetic reconstruction of *Staphylococcus aureus* strains in a  
896 paediatric hospital. *Genome Med* 2018 10:1–19.
- 897 56. Moller AG, Robert A, Petit I, Read TD. 2022. Species-Scale Genomic Analysis

- 898 of *Staphylococcus aureus* Genes Influencing Phage Host Range and Their  
899 Relationships to Virulence and Antibiotic Resistance Genes. *mSystems* 7.  
900 57. Suzuki H, Lefébure T, Bitar PP, Stanhope MJ. 2012. Comparative genomic  
901 analysis of the genus *Staphylococcus* including *Staphylococcus aureus* and its  
902 newly described sister species *Staphylococcus simiae*. *BMC Genomics* 13:38.  
903 58. Hadfield J, Croucher NJ, Goater RJ, Abudahab K, Aanensen DM, Harris SR.  
904 2018. Phandango: An interactive viewer for bacterial population genomics.  
905 *Bioinformatics* <https://doi.org/10.1093/bioinformatics/btx610>.  
906 59. Lees JA, Harris SR, Tonkin-Hill G, Gladstone RA, Lo SW, Weiser JN, Corander  
907 J, Bentley SD, Croucher NJ. 2019. Fast and flexible bacterial genomic  
908 epidemiology with PopPUNK. *Genome Res* 29:304–316.  
909 60. Brynildsrud O, Bohlin J, Scheffer L, Eldholm V. 2016. Rapid scoring of genes in  
910 microbial pan-genome-wide association studies with Scoary. *Genome Biol*  
911 17:238.  
912 61. Anderson KL, Roberts C, Disz T, Vonstein V, Hwang K, Overbeek R, Olson  
913 PD, Projan SJ, Dunman PM. 2006. Characterization of the *Staphylococcus*  
914 *aureus* Heat Shock, Cold Shock, Stringent, and SOS Responses and Their  
915 Effects on Log-Phase mRNA Turnover. *J Bacteriol* 188:6739.  
916 62. C BG, Sahukhal GS, Elasri MO. 2022. Delineating the Role of the *msaABCR*  
917 Operon in *Staphylococcal* Overflow Metabolism. *Front Microbiol* 13:914512.  
918 63. Sahukhal GS, Elasri MO. 2014. Identification and characterization of an  
919 operon, *msaABCR*, that controls virulence and biofilm development in  
920 *Staphylococcus aureus*. *BMC Microbiol* 14:154.  
921 64. Pandey S, Sahukhal GS, Elasri MO. 2021. The *msaABCR* Operon Regulates  
922 Persister Formation by Modulating Energy Metabolism in *Staphylococcus*  
923 *aureus*. *Front Microbiol* 12:881.  
924 65. Murray S, Pascoe B, Méric G, Mageiros L, Yahara K, Hitchings MD, Friedmann  
925 Y, Wilkinson TS, Gormley FJ, Mack D, Bray JE, Lamble S, Bowden R, Jolley  
926 KA, Maiden MCJ, Wendlandt S, Schwarz S, Corander J, Fitzgerald JR,  
927 Sheppard SK. 2017. Recombination-Mediated Host Adaptation by Avian  
928 *Staphylococcus aureus*. *Genome Biol Evol* 9:830–842.  
929 66. Lowder B V., Guinane CM, Zakour NLB, Weinert LA, Conway-Morris A,  
930 Cartwright RA, Simpson AJ, Rambaut A, Nübel U, Fitzgerald JR. 2009. Recent  
931 human-to-poultry host jump, adaptation, and pandemic spread of

- 932           Staphylococcus aureus. Proc Natl Acad Sci U S A 106:19545–19550.
- 933   67.   Jian Y, Zhao L, Zhao N, Lv HY, Liu Y, He L, Liu Q, Li M. 2021. Increasing  
934           prevalence of hypervirulent ST5 methicillin susceptible Staphylococcus aureus  
935           subtype poses a serious clinical threat. Emerg Microbes Infect 10:109.
- 936   68.   Nübel U, Roumagnac P, Feldkamp M, Song JH, Ko KS, Huang YC, Coombs G,  
937           Ip M, Westh H, Skov R, Struelens MJ, Goering R V., Strommenger B, Weller A,  
938           Witte W, Achtman M. 2008. Frequent emergence and limited geographic  
939           dispersal of methicillin-resistant Staphylococcus aureus. Proc Natl Acad Sci U  
940           S A 105:14130–14135.
- 941   69.   Bal AM, Coombs GW, Holden MTG, Lindsay JA, Nimmo GR, Tattevin P, Skov  
942           RL. 2016. Genomic insights into the emergence and spread of international  
943           clones of healthcare-, community- and livestock-associated methicillin-resistant  
944           Staphylococcus aureus: Blurring of the traditional definitions. J Glob Antimicrob  
945           Resist 6:95–101.
- 946   70.   Hsu LY, Harris SR, Chlebowicz MA, Lindsay JA, Koh TH, Krishnan P, Tan TY,  
947           Hon PY, Grubb WB, Bentley SD, Parkhill J, Peacock SJ, Holden MTG. 2015.  
948           Evolutionary dynamics of methicillin-resistant Staphylococcus aureus within a  
949           healthcare system. Genome Biol 16:1–13.
- 950   71.   Kong EF, Johnson JK, Jabra-Rizk MA. 2016. Community-Associated  
951           Methicillin-Resistant Staphylococcus aureus: An Enemy amidst Us. PLOS  
952           Pathog 12:e1005837.
- 953   72.   Strauß L, Stegger M, Akpaka PE, Alabi A, Breurec S, Coombs G, Egyir B,  
954           Larsen AR, Laurent F, Monecke S, Peters G, Skov R, Strommenger B,  
955           Vandenesch F, Schaumburg F, Mellmann A. Origin, evolution, and global  
956           transmission of community-acquired Staphylococcus aureus ST8  
957           <https://doi.org/10.1073/pnas.1702472114>.
- 958   73.   Wyllie DH, Walker AS, Miller R, Moore C, Williamson SR, Schlackow I, Finney  
959           JM, O'Connor L, Peto TEA, Crook DW. 2011. Decline of methicillin-resistant  
960           Staphylococcus aureus in Oxfordshire hospitals is strain-specific and preceded  
961           infection-control intensification. BMJ Open 1:e000160.
- 962   74.   Holden MTG, Hsu LY, Kurt K, Weinert LA, Mather AE, Harris SR, Strommenger  
963           B, Layer F, Witte W, De Lencastre H, Skov R, Westh H, Žemličková H,  
964           Coombs G, Kearns AM, Hill RLR, Edgeworth J, Gould I, Gant V, Cooke J,  
965           Edwards GF, McAdam PR, Templeton KE, McCann A, Zhou Z, Castillo-

- 966           Ramírez S, Feil EJ, Hudson LO, Enright MC, Balloux F, Aanensen DM, Spratt  
967           BG, Fitzgerald JR, Parkhill J, Achtman M, Bentley SD, Nübel U. 2013. A  
968           genomic portrait of the emergence, evolution, and global spread of a  
969           methicillin-resistant *Staphylococcus aureus* pandemic. *Genome Res* 23:653–  
970           664.
- 971   75.   Aires-de-Sousa M, Correia B, De Lencastre H, Alves V, Branca F, Cabral L,  
972           Clemente J, Daniel I, Faustino A, Ferreira E, Lameiras C, Lopes J, Marques J,  
973           Peres I, Ribeiro G, Sancho L, Santos O, Santos P, Vaz MT, Videira Z. 2008.  
974           Changing patterns in frequency of recovery of five methicillin-resistant  
975           *Staphylococcus aureus* clones in Portuguese hospitals: Surveillance over a 16-  
976           year period. *J Clin Microbiol* 46:2912–2917.
- 977   76.   Gill JL, Hedge J, Wilson DJ, MacLean RC. 2021. Evolutionary Processes  
978           Driving the Rise and Fall of *Staphylococcus aureus* ST239, a Dominant Hybrid  
979           Pathogen. *MBio* <https://doi.org/10.1128/MBIO.02168-21>.
- 980   77.   Wang M, Zheng Y, Mediavilla JR, Chen L, Kreiswirth BN, Song Y, Yang R, Du  
981           H. 2017. Hospital Dissemination of *tst-1*-Positive Clonal Complex 5 (CC5)  
982           Methicillin-Resistant *Staphylococcus aureus*. *Front Cell Infect Microbiol* 7.
- 983   78.   Goudarzi M, Razeghi M, Chirani AS, Fazeli M, Tayebi Z, Pouriran R. 2020.  
984           Characteristics of methicillin-resistant *Staphylococcus aureus* carrying the toxic  
985           shock syndrome toxin gene: high prevalence of clonal complex 22 strains and  
986           the emergence of new *spa* types *t223* and *t605* in Iran. *New Microbes New*  
987           *Infect* 36:100695.
- 988   79.   Brescó MS, Harris LG, Thompson K, Stanic B, Morgenstern M, O'Mahony L,  
989           Richards RG, Moriarty TF. 2017. Pathogenic mechanisms and host interactions  
990           in *Staphylococcus epidermidis* device-related infection. *Front Microbiol* 8:1401.
- 991   80.   Fey PD, Olson ME. 2010. Current concepts in biofilm formation of  
992           *Staphylococcus epidermidis*. *Future Microbiol* 5:917.
- 993   81.   Mack D. 1999. Molecular mechanisms of *Staphylococcus epidermidis* biofilm  
994           formation. *J Hosp Infect* 43:S113–S125.
- 995   82.   Harris LG, Murray S, Pascoe B, Bray J, Meric G, Magerios L, Wilkinson TS,  
996           Jeeves R, Rohde H, Schwarz S, De Lencastre H, Miragaia M, Rolo J, Bowden  
997           R, Jolley KA, Maiden MCJ, Mack D, Sheppard SK. 2016. Biofilm Morphotypes  
998           and Population Structure among *Staphylococcus epidermidis* from Commensal  
999           and Clinical Samples. *PLoS One* 11.



- 1000 83. Clauditz A, Resch A, Wieland KP, Peschel A, Götz F. 2006. Staphyloxanthin  
1001 Plays a Role in the Fitness of *Staphylococcus aureus* and Its Ability To Cope  
1002 with Oxidative Stress. *Infect Immun* 74:4950.
- 1003 84. Xue L, Chen YY, Yan Z, Lu W, Wan D, Zhu H. 2019. Staphyloxanthin: a  
1004 potential target for antivirulence therapy. *Infect Drug Resist* 12:2151.
- 1005 85. Post V, Wahl P, Uçkay I, Ochsner P, Zimmerli W, Corvec S, Loiez C, Richards  
1006 RG, Moriarty TF. 2014. Phenotypic and genotypic characterisation of  
1007 *Staphylococcus aureus* causing musculoskeletal infections. *Int J Med Microbiol*  
1008 304:565–576.
- 1009 86. Rooijackers SHM, Ruyken M, van Roon J, van Kessel KPM, van Strijp JAG,  
1010 van Wamel WJB. 2006. Early expression of SCIN and CHIPS drives instant  
1011 immune evasion by *Staphylococcus aureus*. *Cell Microbiol* 8:1282–1293.
- 1012 87. De Haas CJC, Veldkamp KE, Peschel A, Weerkamp F, Van Wamel WJB,  
1013 Heezius ECJM, Poppelier MJJG, Van Kessel KPM, Van Strijp JAG. 2004.  
1014 Chemotaxis Inhibitory Protein of *Staphylococcus aureus*, a Bacterial  
1015 Antiinflammatory Agent. *J Exp Med* 199:687.
- 1016 88. Uçkay I, Teterycz D, Ferry T, Harbarth S, Lübbecke A, Emonet S, Chilcott M,  
1017 Hoffmeyer P, Bernard L. 2009. Poor utility of MRSA screening to predict  
1018 staphylococcal species in orthopaedic implant infections. *J Hosp Infect* 73:89–  
1019 91.
- 1020 89. Ferry T, Uçkay I, Vaudaux P, François P, Schrenzel J, Harbarth S, Laurent F,  
1021 Bernard L, Vandenesch F, Etienne J, Hoffmeyer P, Lew D. 2010. Risk factors  
1022 for treatment failure in orthopedic device-related methicillin-resistant  
1023 *Staphylococcus aureus* infection. *Eur J Clin Microbiol Infect Dis* 29:171–180.
- 1024 90. Young BC, Wu C-H, Charlesworth J, Earle S, Price JR, Gordon NC, Cole K,  
1025 Dunn L, Liu E, Oakley S, Godwin H, Fung R, Miller R, Knox K, Votintseva A,  
1026 Quan TP, Tilley R, Scarborough M, Crook DW, Peto TE, Walker AS, Llewelyn  
1027 MJ, Wilson DJ. 2021. Antimicrobial resistance determinants are associated  
1028 with *Staphylococcus aureus* bacteraemia and adaptation to the healthcare  
1029 environment: a bacterial genome-wide association study. *Microb Genomics*  
1030 7:700.
- 1031 91. Castillo-Ramírez S, Corander J, Marttinen P, Aldeljawi M, Hanage WP, Westh  
1032 H, Boye K, Gulay Z, Bentley SD, Parkhill J, Holden MT, Feil EJ. 2012.  
1033 Phylogeographic variation in recombination rates within a global clone of

- 1034            methicillin-resistant *Staphylococcus aureus*. *Genome Biol* 13:1–13.
- 1035    92.   Earle SG, Wu C-H, Charlesworth J, Stoesser N, Gordon NC, Walker TM,  
1036            Spencer CCA, Iqbal Z, Clifton DA, Hopkins KL, Woodford N, Smith EG, Ismail  
1037            N, Llewelyn MJ, Peto TE, Crook DW, McVean G, Walker AS, Wilson DJ. 2016.  
1038            Identifying lineage effects when controlling for population structure improves  
1039            power in bacterial association studies. *Nat Microbiol* 1:16041.
- 1040    93.   Collins C, Didelot X. 2018. A phylogenetic method to perform genome-wide  
1041            association studies in microbes that accounts for population structure and  
1042            recombination. *PLoS Comput Biol* 14.
- 1043    94.   Taylor AJ, Méric G, Yahara K, Pascoe B, Mageiros L, Mourkas E, Calland JK,  
1044            Puranen S, Hitchings MD, Jolley KA, Kobras CM, Williams NJ, Vliet AHM van,  
1045            Parkhill J, Maiden MCJ, Corander J, Hurst LD, Falush D, Didelot X, Kelly DJ,  
1046            Sheppard SK. 2022. A two-hit epistasis model prevents core genome  
1047            disharmony in recombining bacteria. *bioRxiv* 2021.03.15.435406.
- 1048    95.   Yokoyama M, Stevens E, Laabei M, Bacon L, Heesom K, Bayliss S, Ooi N,  
1049            O'Neill AJ, Murray E, Williams P, Lubben A, Reeksting S, Meric G, Pascoe B,  
1050            Sheppard SK, Recker M, Hurst LD, Massey RC. 2018. Epistasis analysis  
1051            uncovers hidden antibiotic resistance-associated fitness costs hampering the  
1052            evolution of MRSA. *Genome Biol* 19.
- 1053    96.   Paterson GK, Harrison EM, Murray GGR, Welch JJ, Warland JH, Holden MTG,  
1054            Morgan FJE, Ba X, Koop G, Harris SR, Maskell DJ, Peacock SJ, Herrtage ME,  
1055            Parkhill J, Holmes MA. 2015. Capturing the cloud of diversity reveals  
1056            complexity and heterogeneity of MRSA carriage, infection and transmission.  
1057            *Nat Commun* 2015 6:1–10.
- 1058    97.   Didelot X, Walker AS, Peto TE, Crook DW, Wilson DJ. 2016. Within-host  
1059            evolution of bacterial pathogens. *Nat Rev Microbiol*. Nature Publishing Group.
- 1060    98.   Golubchik T, Batty EM, Miller RR, Farr H, Young BC, Lerner-Svensson H, Fung  
1061            R, Godwin H, Knox K, Votintseva A, Everitt RG, Street T, Cule M, Ip CLC,  
1062            Didelot X, Peto TEA, Harding RM, Wilson DJ, Crook DW, Bowden R. 2013.  
1063            Within-Host Evolution of *Staphylococcus aureus* during Asymptomatic  
1064            Carriage. *PLoS One* 8.
- 1065    99.   Young BC, Golubchik T, Batty EM, Fung R, Lerner-Svensson H, Votintseva  
1066            AA, Miller RR, Godwin H, Knox K, Everitt RG, Iqbal Z, Rimmer AJ, Cule M, Ip  
1067            CLC, Didelot X, Harding RM, Donnelly P, Peto TE, Crook DW, Bowden R,

- 1068 Wilsona DJ. 2012. Evolutionary dynamics of *Staphylococcus aureus* during  
1069 progression from carriage to disease. *Proc Natl Acad Sci* 109:4550–4555.
- 1070 100. Kahl BC. 2014. Small colony variants (SCVs) of *Staphylococcus aureus* – A  
1071 bacterial survival strategy. *Infect Genet Evol* 21:515–522.
- 1072 101. Loss G, Simões PM, Valour F, Cortês MF, Gonzaga L, Bergot M, Trouillet-  
1073 Assant S, Josse J, Diot A, Ricci E, Vasconcelos AT, Laurent F. 2019.  
1074 *Staphylococcus aureus* Small Colony Variants (SCVs): News From a Chronic  
1075 Prosthetic Joint Infection. *Front Cell Infect Microbiol* 9:363.
- 1076 102. Peyrusson F, Varet H, Nguyen TK, Legendre R, Sismeiro O, Coppée JY, Wolz  
1077 C, Tenson T, Van Bambeke F. 2020. Intracellular *Staphylococcus aureus*  
1078 persists upon antibiotic exposure. *Nat Commun* 2020 11:1–14.
- 1079 103. Lechner S, Lewis K, Bertram R. 2012. *Staphylococcus aureus* Persists  
1080 Tolerant to Bactericidal Antibiotics. *Microb Physiol* 22:235–244.
- 1081 104. Pascoe B, Dams L, Wilkinson TS, Harris LG, Bodger O, Mack D, Davies AP.  
1082 2014. Dormant cells of *Staphylococcus aureus* are resuscitated by spent  
1083 culture supernatant. *PLoS One* 9.
- 1084 105. Conlon BP, Rowe SE, Gandt AB, Nuxoll AS, Donegan NP, Zalis EA, Clair G,  
1085 Adkins JN, Cheung AL, Lewis K. 2016. Persister formation in *Staphylococcus*  
1086 *aureus* is associated with ATP depletion. *Nat Microbiol* 1.
- 1087 106. Bankevich A, Nurk S, Antipov D, Gurevich AA, Dvorkin M, Kulikov AS, Lesin  
1088 VM, Nikolenko SI, Pham S, Pribelski AD, Pyshkin A V., Sirotkin A V., Vyahhi  
1089 N, Tesler G, Alekseyev MA, Pevzner PA. 2012. SPAdes: A New Genome  
1090 Assembly Algorithm and Its Applications to Single-Cell Sequencing. *J Comput*  
1091 *Biol* 19:455–477.
- 1092 107. Katoh K, Standley DM. 2013. MAFFT Multiple Sequence Alignment Software  
1093 Version 7: Improvements in Performance and Usability. *Mol Biol Evol* 30:772–  
1094 780.
- 1095 108. Nguyen L-T, Schmidt HA, von Haeseler A, Minh BQ. 2015. IQ-TREE: A Fast  
1096 and Effective Stochastic Algorithm for Estimating Maximum-Likelihood  
1097 Phylogenies. *Mol Biol Evol* 32:268–274.
- 1098 109. Hoang DT, Chernomor O, von Haeseler A, Minh BQ, Vinh LS. 2018. UFBoot2:  
1099 Improving the Ultrafast Bootstrap Approximation. *Mol Biol Evol* 35:518–522.
- 1100 110. Argimón S, Abudahab K, Goater RJE, Fedosejev A, Bhai J, Glasner C, Feil EJ,  
1101 Holden MTG, Yeats CA, Grundmann H, Spratt BG, Aanensen DM. 2016.

- 1102            Microreact: visualizing and sharing data for genomic epidemiology and  
1103            phylogeography. *Microb Genomics* 2.
- 1104    111. Jolley KA, Bray JE, Maiden MCJ. 2018. Open-access bacterial population  
1105            genomics: BIGSdb software, the PubMLST.org website and their applications.  
1106            Wellcome open Res 3.
- 1107    112. Petit RA, Read TD. 2018. *Staphylococcus aureus* viewed from the perspective  
1108            of 40,000+ genomes. *PeerJ* 2018:e5261.
- 1109    113. Bartels MD, Petersen A, Worning P, Nielsen JB, Lerner-Svensson H, Johansen  
1110            HK, Andersen LP, Jarløv JO, Boye K, Larsen AR, Westh H. 2014. Comparing  
1111            Whole-Genome Sequencing with Sanger Sequencing for spa Typing of  
1112            Methicillin-Resistant *Staphylococcus aureus*. *J Clin Microbiol* 52:4305.
- 1113    114. Chen L, Zheng D, Liu B, Yang J, Jin Q. 2016. VFDB 2016: Hierarchical and  
1114            refined dataset for big data analysis - 10 years on. *Nucleic Acids Res* 44:D694–  
1115            D697.
- 1116    115. Feldgarden M, Brover V, Haft DH, Prasad AB, Slotta DJ, Tolstoy I, Tyson GH,  
1117            Zhao S, Hsu C-H, McDermott PF, Tadesse DA, Morales C, Simmons M,  
1118            Tillman G, Wasilenko J, Folster JP, Klimke W. 2019. Using the NCBI  
1119            AMRFinder Tool to Determine Antimicrobial Resistance Genotype-Phenotype  
1120            Correlations Within a Collection of NARMS Isolates. *bioRxiv* 550707.
- 1121    116. Alcock BP, Raphenya AR, Lau TTY, Tsang KK, Bouchard M, Edalatmand A,  
1122            Huynh W, Nguyen A-L V, Cheng AA, Liu S, Min SY, Miroshnichenko A, Tran H-  
1123            K, Werfalli RE, Nasir JA, Oloni M, Speicher DJ, Florescu A, Singh B, Faltyn M,  
1124            Hernandez-Koutoucheva A, Sharma AN, Bordeleau E, Pawlowski AC, Zubyk  
1125            HL, Dooley D, Griffiths E, Maguire F, Winsor GL, Beiko RG, Brinkman FSL,  
1126            Hsiao WWL, Domselaar G V, McArthur AG. 2019. CARD 2020: antibiotic  
1127            resistome surveillance with the comprehensive antibiotic resistance database.  
1128            *Nucleic Acids Res* <https://doi.org/10.1093/nar/gkz935>.
- 1129    117. Altschul SF, Gish W, Miller W, Myers EW, Lipman DJ. 1990. Basic local  
1130            alignment search tool. *J Mol Biol* 215:403–410.
- 1131    118. EFSA/ECDC. 2019. European Food Safety Authority and European Centre for  
1132            Disease Prevention and Control. The European Union summary report on  
1133            antimicrobial resistance in zoonotic and indicator bacteria from humans,  
1134            animals and food in 2017. *EFSA J* 17:5598.
- 1135    119. Herbert S, Ziebandt AK, Ohlsen K, Schäfer T, Hecker M, Albrecht D, Novick R,

- 1136 Götz F. 2010. Repair of Global Regulators in *Staphylococcus aureus* 8325 and  
1137 Comparative Analysis with Other Clinical Isolates. *Infect Immun* 78:2877.
- 1138 120. Stepanović S, Vuković D, Hola V, Di Bonaventura G, Djukić S, Ćirković I,  
1139 Ruzicka F. 2007. Quantification of biofilm in microtiter plates: overview of  
1140 testing conditions and practical recommendations for assessment of biofilm  
1141 production by staphylococci. *APMIS* 115:891–899.
- 1142 121. Ignasiak K, Maxwell A. 2017. *Galleria mellonella* (greater wax moth) larvae as  
1143 a model for antibiotic susceptibility testing and acute toxicity trials. *BMC Res*  
1144 *Notes* 10:428.
- 1145 122. Desbois AP, Coote PJ. 2011. Wax moth larva (*Galleria mellonella*): an in vivo  
1146 model for assessing the efficacy of antistaphylococcal agents. *J Antimicrob*  
1147 *Chemother* 66:1785–1790.
- 1148 123. Croucher NJ, Page AJ, Connor TR, Delaney AJ, Keane JA, Bentley SD,  
1149 Parkhill J, Harris SR. 2015. Rapid phylogenetic analysis of large samples of  
1150 recombinant bacterial whole genome sequences using Gubbins. *Nucleic Acids*  
1151 *Res* 43:e15–e15.
- 1152 124. Mageiros L, Méric G, Bayliss SC, Pensar J, Pascoe B, Mourkas E, Calland JK,  
1153 Yahara K, Murray S, Wilkinson TS, Williams LK, Hitchings MD, Porter J,  
1154 Kemmett K, Feil EJ, Jolley KA, Williams NJ, Corander J, Sheppard SK. 2021.  
1155 Genome evolution and the emergence of pathogenicity in avian *Escherichia*  
1156 *coli*. *Nat Commun* 12.
- 1157 125. Mourkas E, Florez-Cuadrado D, Pascoe B, Calland JK, Bayliss SC, Mageiros  
1158 L, Méric G, Hitchings MD, Quesada A, Porrero C, Ugarte-Ruiz M, Gutiérrez-  
1159 Fernández J, Domínguez L, Sheppard SK. 2019. Gene pool transmission of  
1160 multidrug resistance among *Campylobacter* from livestock, sewage and human  
1161 disease. *Environ Microbiol* <https://doi.org/10.1111/1462-2920.14760>.
- 1162 126. Schliep KP. 2011. phangorn: phylogenetic analysis in R. *Bioinformatics*  
1163 27:592–593.
- 1164 127. Connor TR, Loman NJ, Thompson S, Smith A, Southgate J, Poplawski R, Bull  
1165 MJ, Richardson E, Ismail M, Thompson SE-, Kitchen C, Guest M, Bakke M,  
1166 Sheppard SK, Pallen MJ. 2016. CLIMB (the Cloud Infrastructure for Microbial  
1167 Bioinformatics): an online resource for the medical microbiology community.  
1168 *Microb Genomics* 2.
- 1169 128. Grüning B, Dale R, Sjödin A, Chapman BA, Rowe J, Tomkins-Tinch CH,

- 1170 Valieris R, Köster J. 2018. Bioconda: sustainable and comprehensive software  
1171 distribution for the life sciences. *Nat Methods* 15:475–476.  
1172 129. Jolley KA, Maiden MCJ. 2010. BIGSdb: Scalable analysis of bacterial genome  
1173 variation at the population level. *BMC Bioinformatics* 11:595.  
1174  
1175

**A**

medRxiv preprint doi: <https://doi.org/10.1101/2022.10.21.22280349>; this version posted October 22, 2022. The copyright holder for this preprint (which was not certified by peer review) is the author/funder, who has granted medRxiv a license to display the preprint in perpetuity. It is made available under a [CC-BY 4.0 International license](https://creativecommons.org/licenses/by/4.0/).

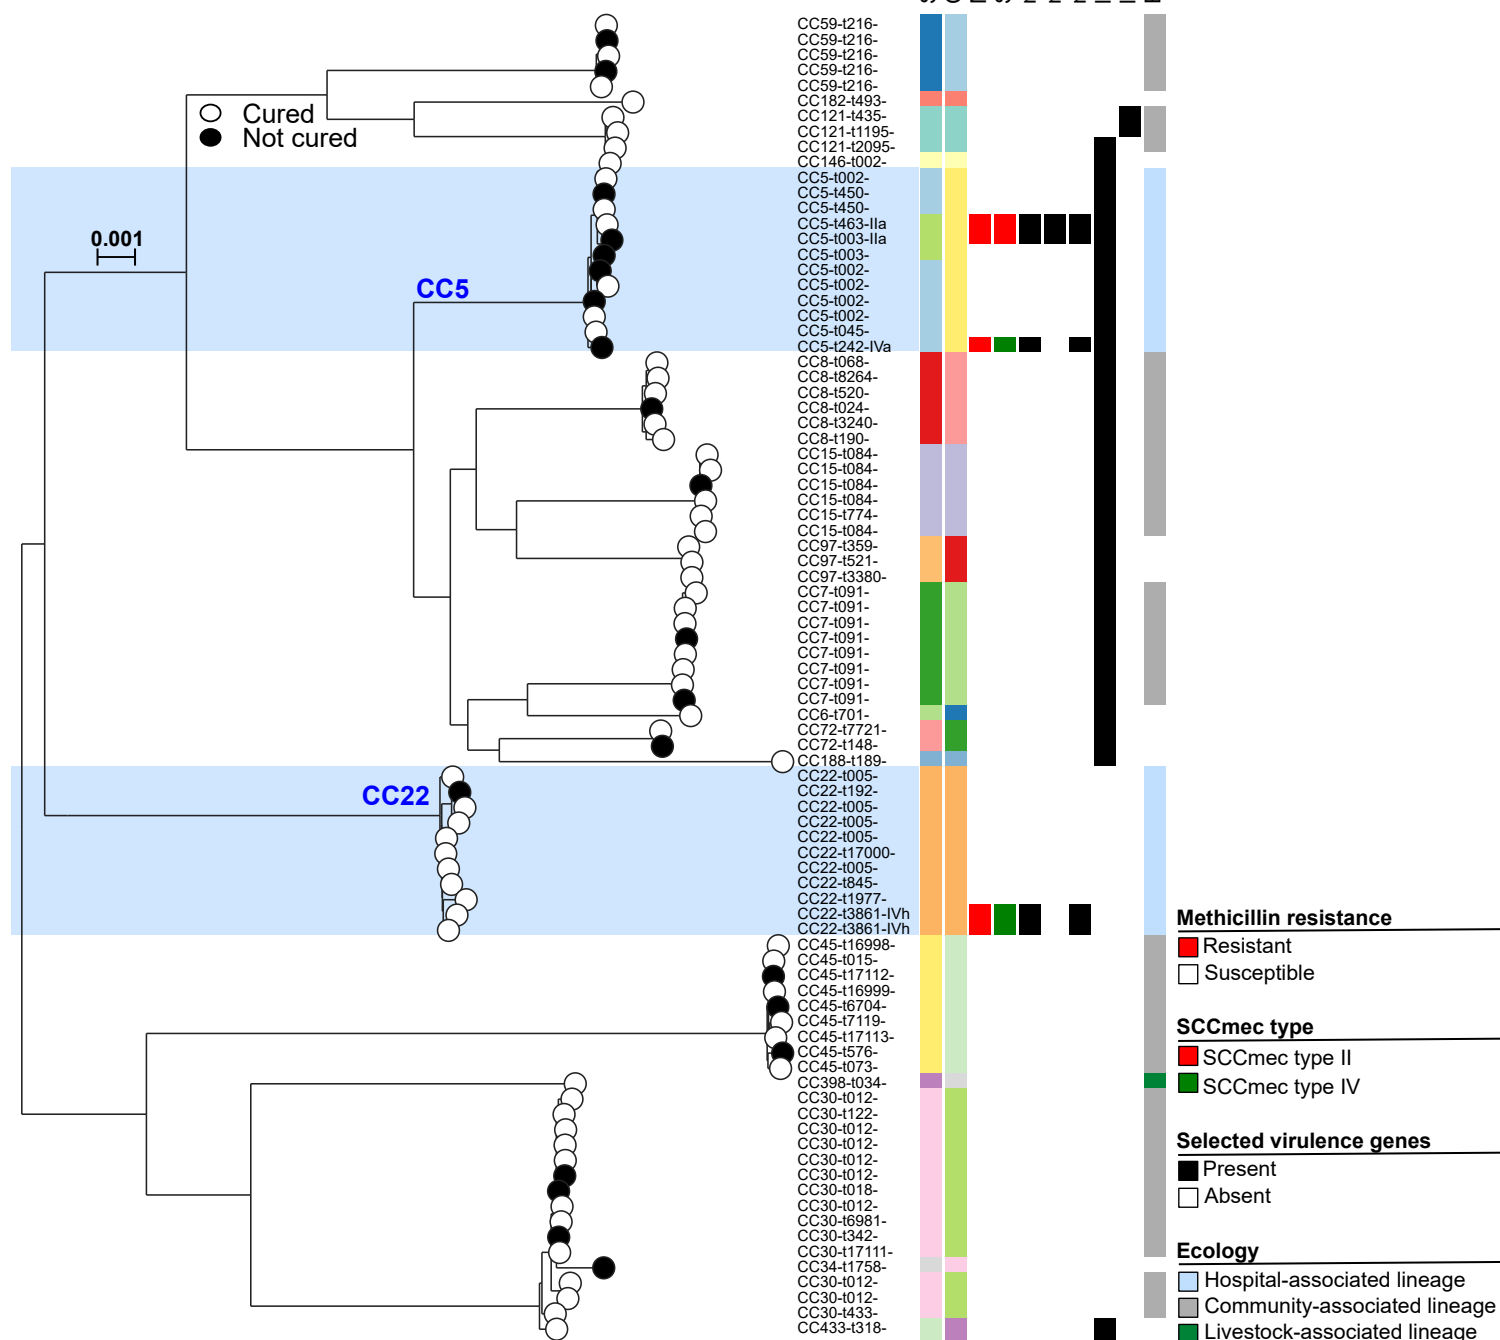

**B**

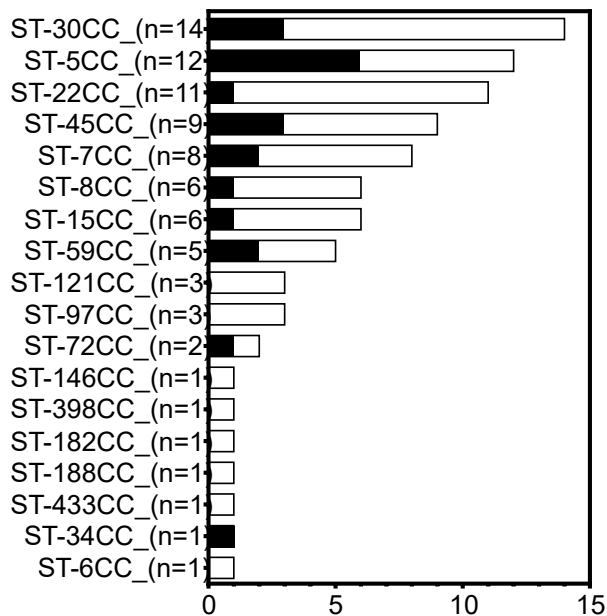

**C**

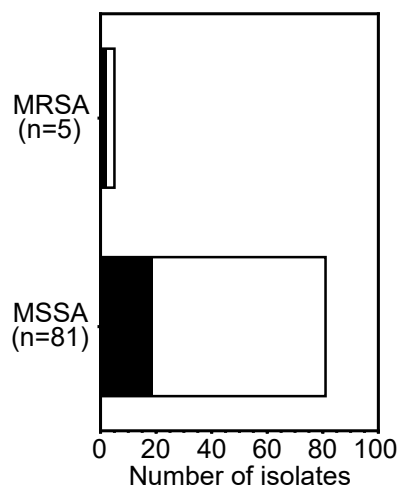

**A**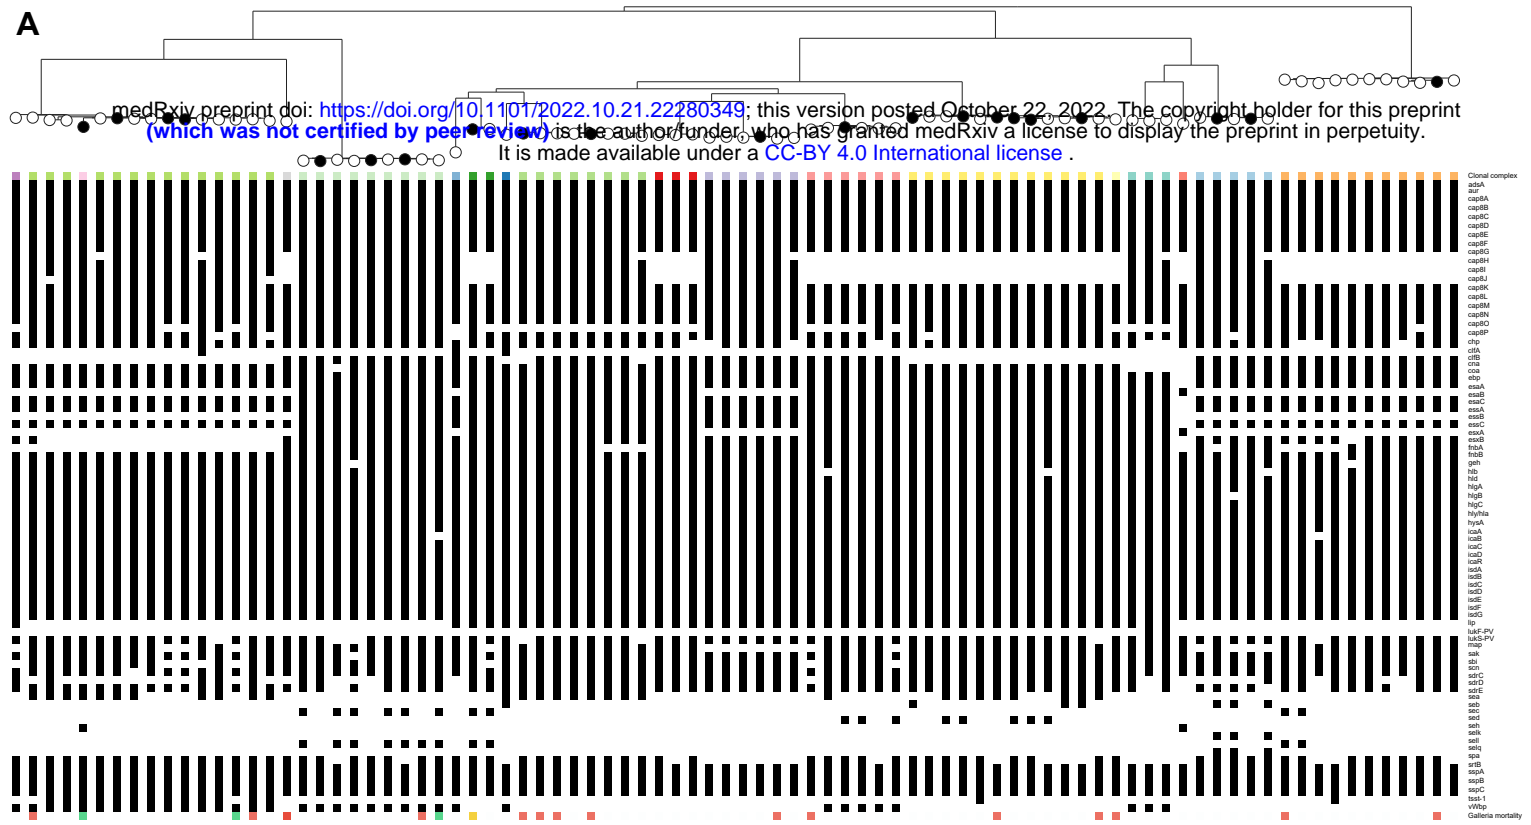**B**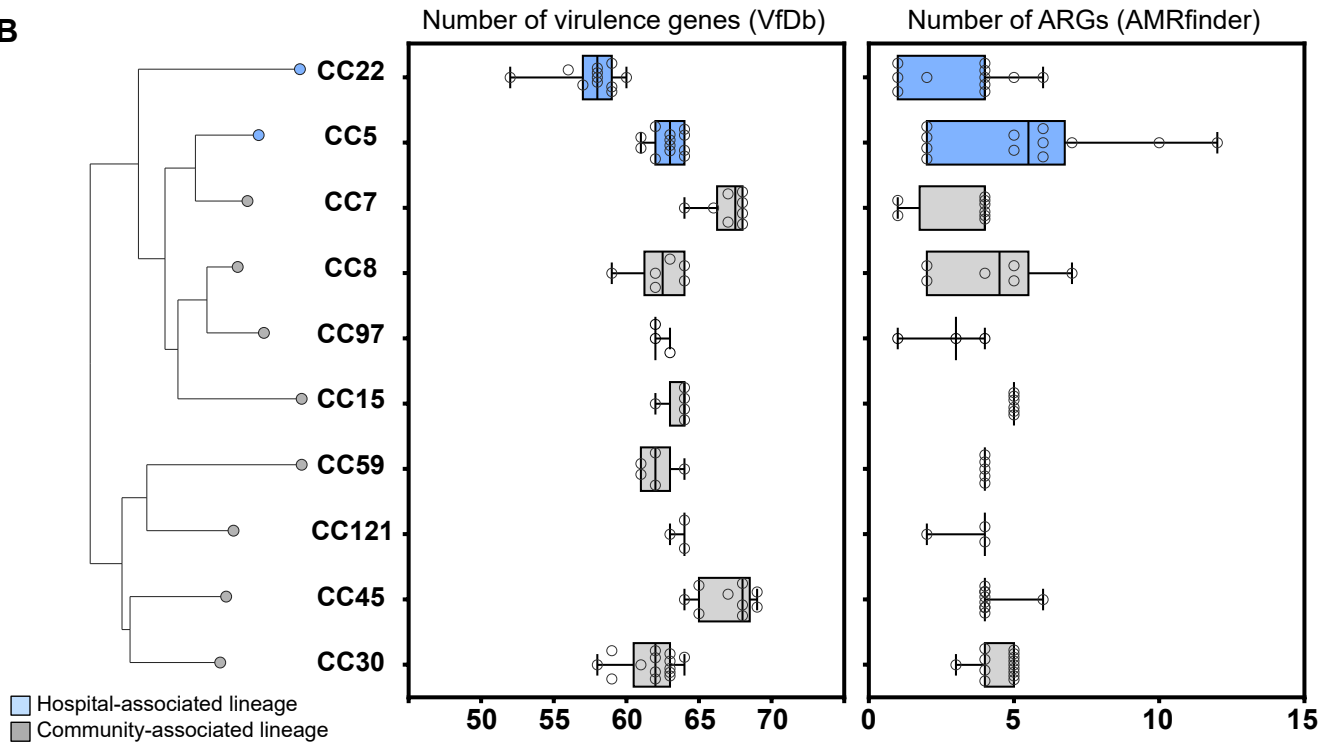**C**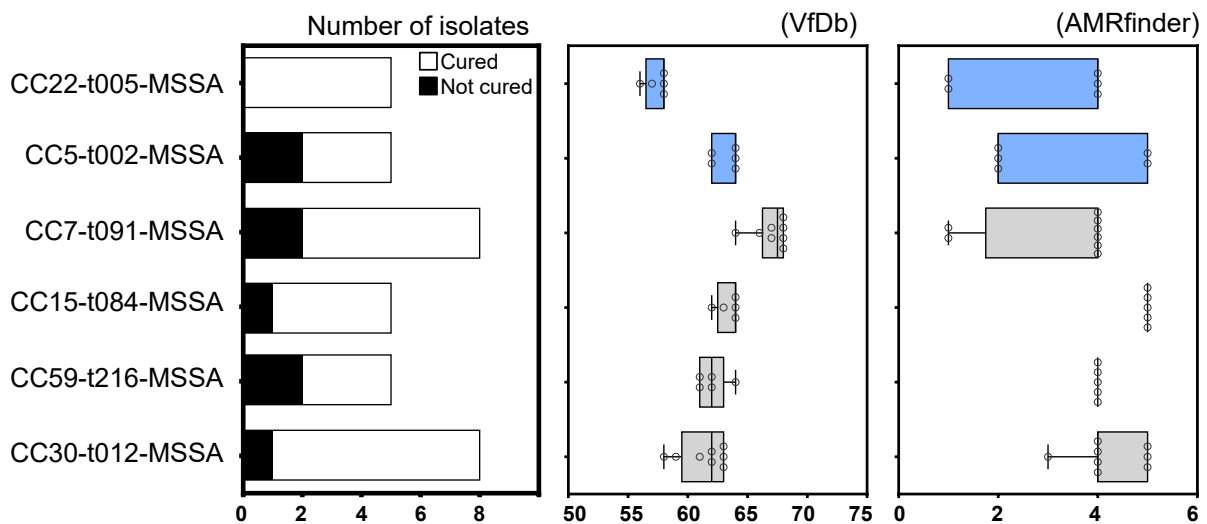



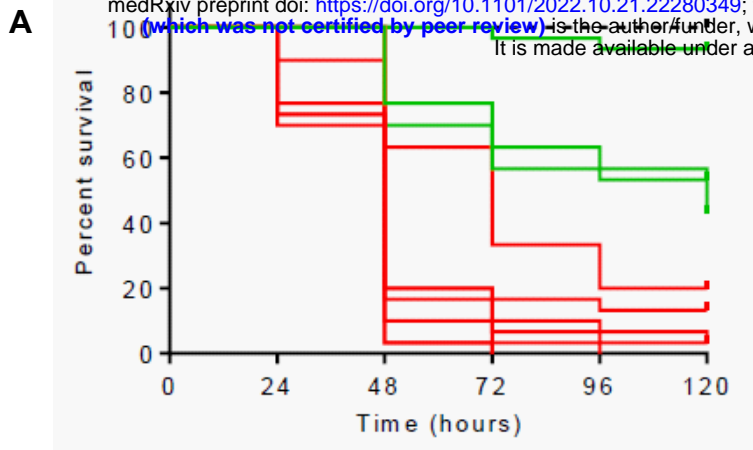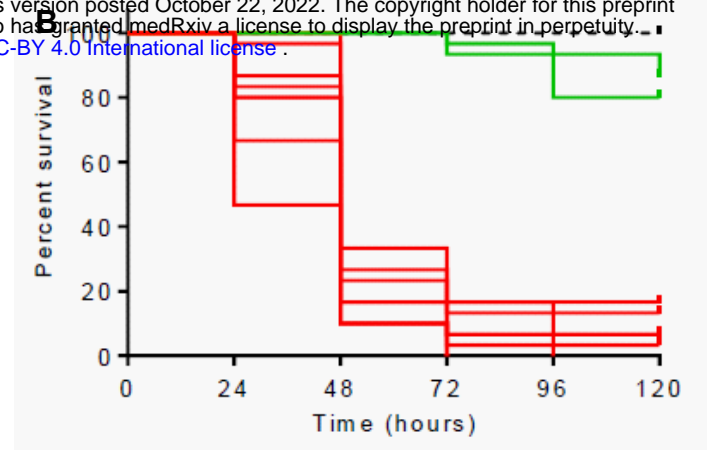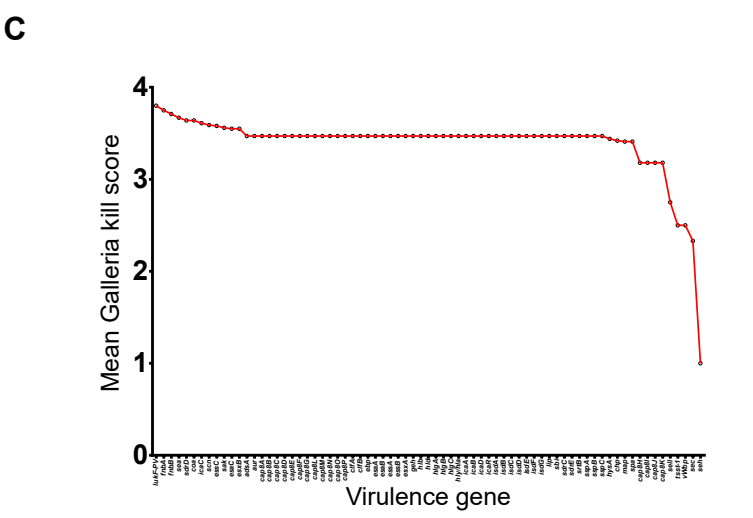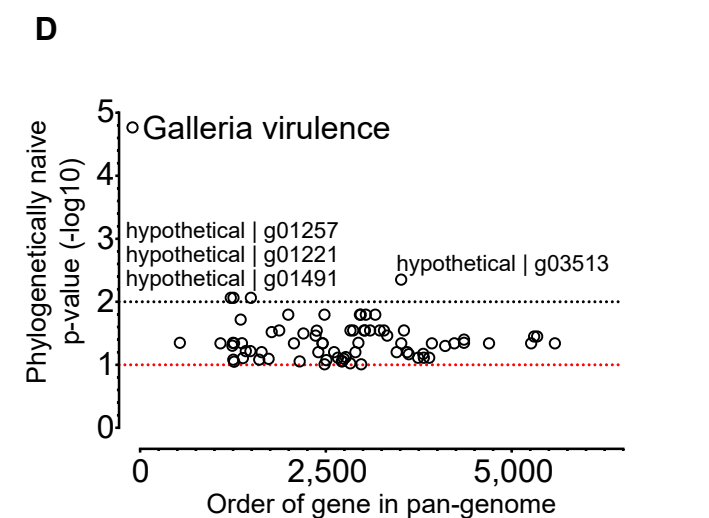

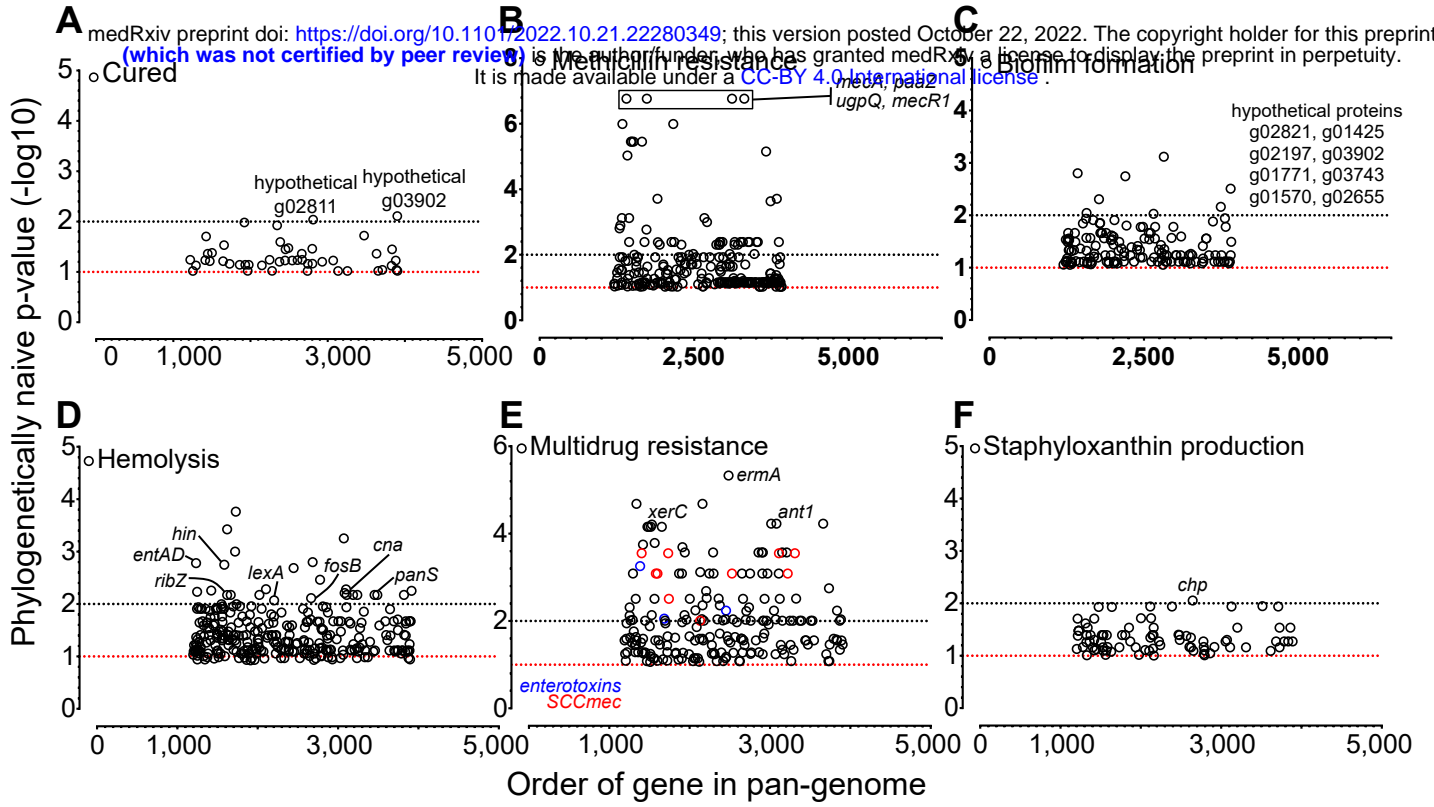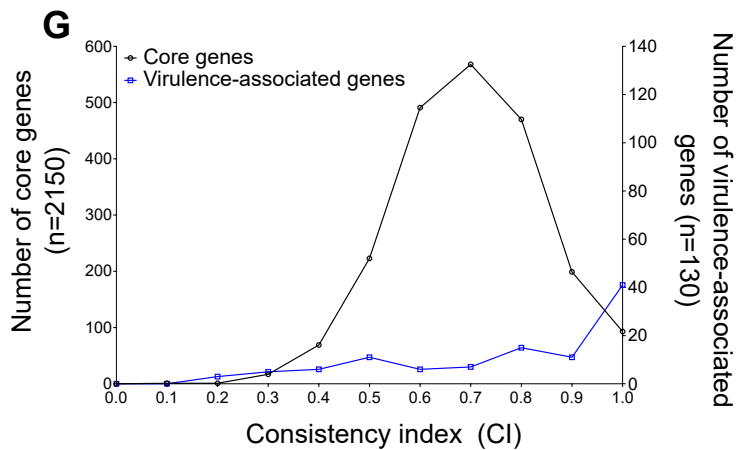

**Table 1:** Cohort description

| <b>Total, n (%)</b>                                        | <b>Complete study cohort</b> |               |
|------------------------------------------------------------|------------------------------|---------------|
|                                                            | <b>86</b>                    | <b>(100%)</b> |
| <b><i>Clinical course and infection outcome, n (%)</i></b> |                              |               |
| Multiple revision surgeries                                | 83                           | 96.5%         |
| Cured                                                      | 65                           | 75.6%         |
| <b><i>Health status, n (%)</i></b>                         |                              |               |
| Obesity                                                    | 25                           | 29.1%         |
| Smoking                                                    | 28                           | 32.6%         |
| Diabetes                                                   | 16                           | 18.6%         |
| Chronic immunosuppression                                  | 11                           | 12.8%         |
| <b><i>Infection characteristics, n (%)</i></b>             |                              |               |
| Peri-prosthetic joint infection                            | 19                           | 22.1%         |
| Acute infection                                            | 25                           | 29.1%         |
| Open fracture (initially)                                  | 21                           | 24.4%         |
| <b><i>Type of implant, n (%)</i></b>                       |                              |               |
| Peri-prosthetic joint infection (PJI)                      | 19                           | 22.1%         |
| Nail                                                       | 19                           | 22.1%         |
| Plate                                                      | 36                           | 41.9%         |
| Screw                                                      | 6                            | 7.0%          |
| Fixateur externe                                           | 4                            | 4.7%          |
| K-wire                                                     | 1                            | 1.2%          |
| Ligament reconstruction device                             | 1                            | 1.2%          |

**Table 2: Patient risk factors**

| Prognostic factor                  | Cured outcome |       |     |        | p-value |
|------------------------------------|---------------|-------|-----|--------|---------|
|                                    | No            |       | Yes |        |         |
|                                    | n=            | (%)   | n=  | (%)    |         |
| <b>Total</b>                       | 21            | 24.4% | 65  | 75.6%  |         |
| <b>Obesity</b>                     |               |       |     |        | 0.295   |
| No                                 | 13            | 21.3% | 48  | 78.7%  |         |
| Yes                                | 8             | 32.0% | 17  | 68.0%  |         |
| <b>Smoking</b>                     |               |       |     |        | 0.931   |
| No                                 | 14            | 24.1% | 44  | 75.9%  |         |
| Yes                                | 7             | 25.0% | 21  | 75.0%  |         |
| <b>Diabetes mellitus</b>           |               |       |     |        | 0.559   |
| No                                 | 18            | 25.7% | 52  | 74.3%  |         |
| Yes                                | 3             | 18.8% | 13  | 81.3%  |         |
| <b>Chronic immunosuppression</b>   |               |       |     |        | 0.606   |
| No                                 | 19            | 25.3% | 56  | 74.7%  |         |
| Yes                                | 2             | 18.2% | 9   | 81.8%  |         |
| <b>Open fracture (initially)</b>   |               |       |     |        | 0.510   |
| No                                 | 17            | 26.2% | 48  | 73.8%  |         |
| Yes                                | 4             | 19.0% | 17  | 81.0%  |         |
| <b>Acute infection</b>             |               |       |     |        | 0.541   |
| No                                 | 16            | 26.2% | 45  | 73.8%  |         |
| Yes                                | 5             | 20.0% | 20  | 80.0%  |         |
| <b>Multiple revision surgeries</b> |               |       |     |        | 0.316   |
| No                                 | 0             | 0.0%  | 3   | 100.0% |         |
| Yes                                | 21            | 25.3% | 62  | 74.7%  |         |

**Table 3:** Phenotypic risk factors

| <i>S. aureus</i> phenotype               | Cured outcome |    |        |    | p-value  |
|------------------------------------------|---------------|----|--------|----|----------|
|                                          |               | No | Yes    |    |          |
|                                          |               | n= | (%)    | n= | (%)      |
| <b>Total</b>                             |               | 21 | 24.4%  | 65 | 75.6%    |
| <b><i>Biofilm formation</i></b>          |               |    |        |    | 0.429    |
|                                          | No            | 14 | 27.5%  | 37 | 72.5%    |
|                                          | Yes           | 7  | 20.0%  | 28 | 80.0%    |
| <b><i>Staphyloxanthin production</i></b> |               |    |        |    | 0.976    |
|                                          | No            | 8  | 24.2%  | 25 | 75.8%    |
|                                          | Yes           | 13 | 24.5%  | 40 | 75.5%    |
| <b><i>Hemolysis activity</i></b>         |               |    |        |    | 0.090 ** |
|                                          | No            | 16 | 30.8%  | 36 | 69.2%    |
|                                          | Yes           | 5  | 14.7%  | 29 | 85.3%    |
| <b><i>Methicillin resistance</i></b>     |               |    |        |    | 0.598    |
|                                          | No            | 19 | 23.8%  | 61 | 76.3%    |
|                                          | Yes           | 2  | 33.3%  | 4  | 66.7%    |
| <b><i>Aminoglycoside resistance</i></b>  |               |    |        |    | 0.077 *  |
|                                          | No            | 20 | 23.5%  | 65 | 76.5%    |
|                                          | Yes           | 1  | 100.0% | 0  | 0.0%     |
| <b><i>Multi-drug resistance</i></b>      |               |    |        |    | 0.139    |
|                                          | No            | 17 | 22.1%  | 60 | 77.9%    |
|                                          | Yes           | 4  | 44.4%  | 5  | 55.6%    |

**Table 4:** Phenotype associations in combination with enhanced biofilm formation

|                                   | <b>Cured outcome</b> |           |
|-----------------------------------|----------------------|-----------|
|                                   | No                   | Yes       |
|                                   | n (%)                | n (%)     |
| <b>Total</b>                      | 21 (24.4)            | 65 (75.6) |
| <b>Biofilm formation</b>          |                      |           |
| <b>Positive (n=35; 40.7%)</b>     | 7 (20.0)             | 28 (80.0) |
| <b>Multi-drug resistance</b>      |                      |           |
| Yes (n=5; 14.3%)                  | 2 (40.0)             | 3 (60.0)  |
| No (n=30; 85.7%)                  | 5 (16.7)             | 25 (83.3) |
| <b>Methicillin resistance</b>     |                      |           |
| Yes (n=1; 2.9%)                   | 0 (0)                | 1 (100)   |
| No (n=34; 97.1%)                  | 7 (20.6)             | 27 (79.4) |
| <b>Haemolytic activity</b>        |                      |           |
| Yes (n=10; 28.6%)                 | 0 (0)                | 10 (100)  |
| No (n=25; 71.4%)                  | 7 (28.0)             | 18 (72.0) |
| <b>Staphyloxanthin production</b> |                      |           |
| Yes (n=27; 77.1%)                 | 4 (22.2)             | 14 (77.8) |
| No (n=8; 22.9%)                   | 2 (25.0)             | 6 (75.0)  |
| <b>Negative (n=51; 59.3%)</b>     | 14 (27.5)            | 37 (72.5) |
| <b>Multi-drug resistance</b>      |                      |           |
| Yes (n=4; 7.8%)                   | 2 (50.0)             | 2 (50.0)  |
| No (n=47; 92.2%)                  | 12 (25.5)            | 35 (74.5) |
| <b>Methicillin resistance</b>     |                      |           |
| Yes (n=5; 9.8%)                   | 2 (40.0)             | 3 (60.0)  |
| No (n=46; 90.2%)                  | 12 (26.1)            | 34 (73.9) |
| <b>Haemolytic activity</b>        |                      |           |
| Yes (n=24; 47.1%)                 | 21 (87.5)            | 3 (12.5)  |
| No (n=27; 52.9%)                  | 25 (92.6)            | 2 (7.4)   |
| <b>Staphyloxanthin production</b> |                      |           |
| Yes (n=26; 51.0%)                 | 15 (57.7)            | 11 (42.3) |
| No (n=25; 49.0%)                  | 12 (48.0)            | 13 (52.0) |
