# Supplementary material for: Multiple hypervirulent methicillin-sensitive Staphylococcus aureus lineages contribute towards poor patient outcomes in orthopedic device-related infections
Source: bioRxiv or medRxiv preprint supplement (doi:10.1101/2022.10.21.22280349), 2022-10-22

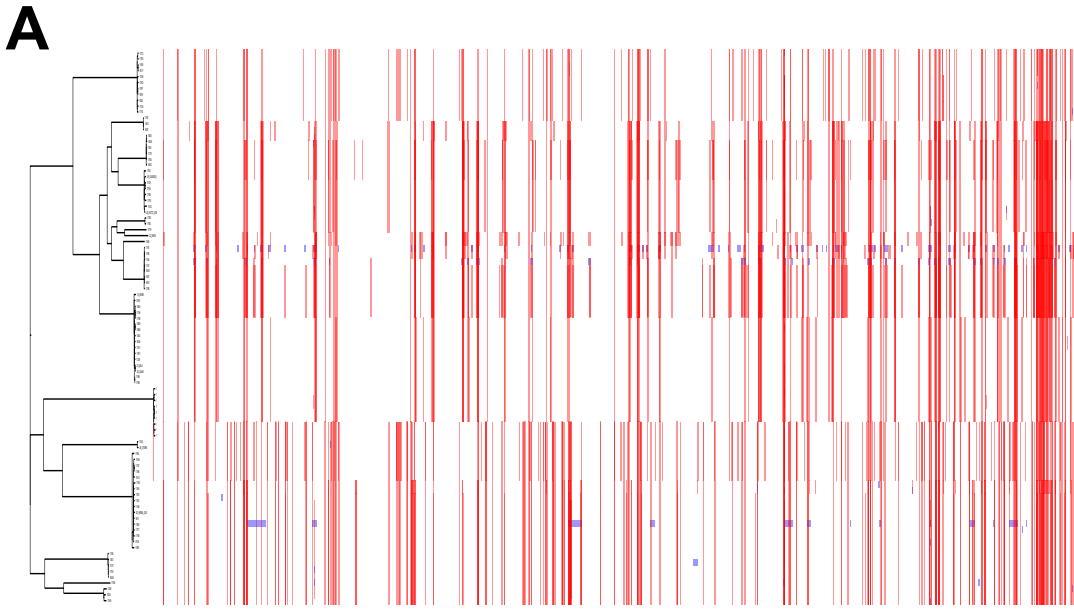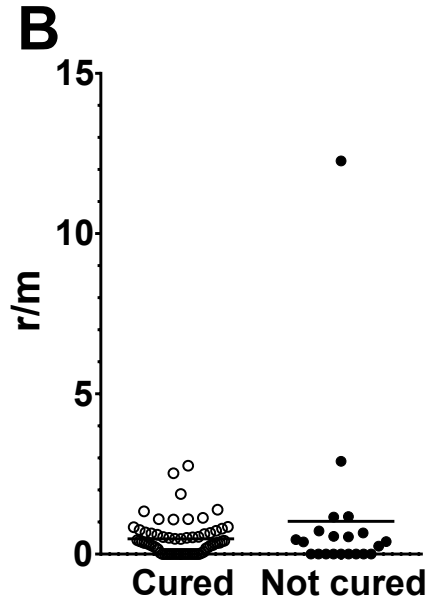

Supplement: Supplementary file [file media-2.pdf]
